# Supplementary material for: OMI air-quality monitoring over the Middle East
Source: Copernicus journal article supplement (doi:10.5194/acp-2016-784), 2016-10-04
Supplement: Supplementary file 1 [file acp-2016-784-supplement.zip]

# OMI air-quality monitoring over the Middle East – Supplementary Material

Michael Barkley<sup>1</sup>, Gonzalo Gonzalez Abad<sup>2</sup>, Thomas P. Kurosu<sup>3</sup>, Robert Spurr<sup>4</sup>,  
Sara Torbatian<sup>5</sup>, and Christophe Lerot<sup>6</sup>

<sup>1</sup>Earth Observation Science Group, Department of Physics and Astronomy, University of Leicester,  
UK.

<sup>2</sup>Atomic and Molecular Physics Division, Harvard-Smithsonian Center for Astrophysics,  
Cambridge, Massachusetts, USA.

<sup>3</sup>NASA Jet Propulsion Laboratory, Pasadena, California, USA.

<sup>4</sup>RT Solutions Inc, Cambridge, Massachusetts, USA.

<sup>5</sup>Air Quality Meteorologist, Air Quality Control Company (AQCC), Tehran, Iran.

<sup>6</sup>Belgian Institute for Space Aeronomy (BIRA-IASB), Brussels, Belgium.

*Correspondence to:* Michael Barkley (mpb14@le.ac.uk)

## 1 Introduction

This supplementary material contains additional figures and tables to support the analysis described in the main text. It is structured as follows. Section 2 contains the supporting figures, whilst Section 3 contains tabulated statistics. Tables S2 to S4 showing the results of the sensitivity analysis conducted in Section 5 of the main text. The sensitivity tests are numbered in correspondence to their descriptions in the manuscript.

## 2 Ancillary Figures

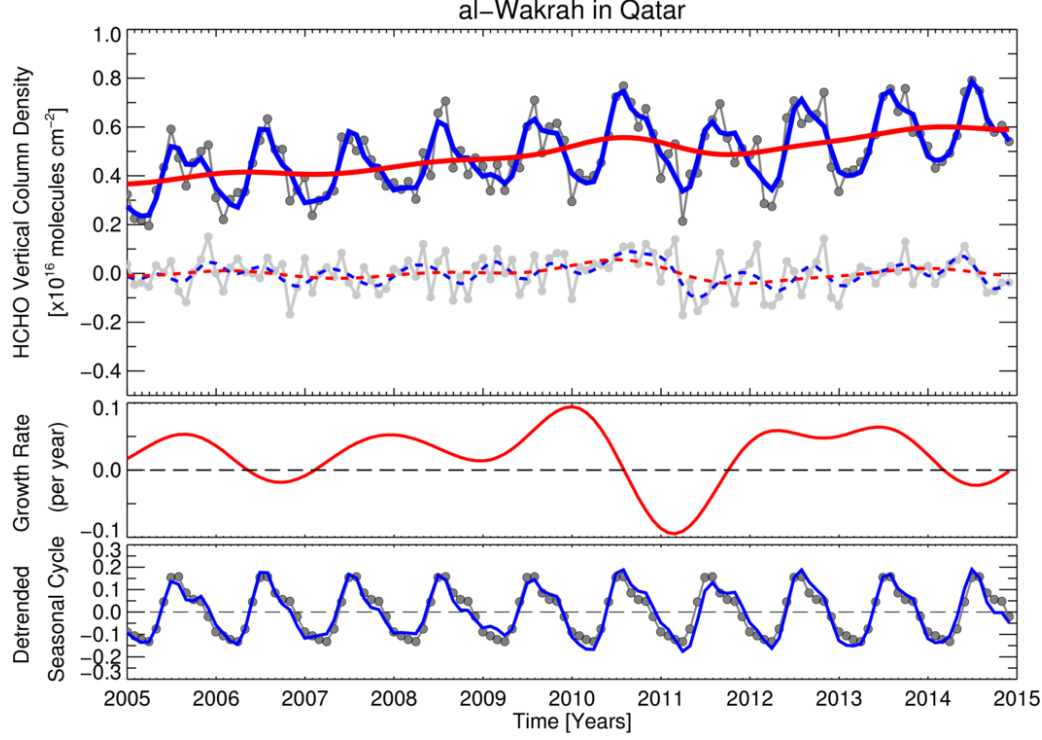

**Figure 1.** An example of a time series fit to observed HCHO data over al-Wakrah (Qatar), as outlined in Section 3.3. Top panel: the monthly OMI HCHO vertical columns are indicated by dark grey filled circles, whilst the light grey filled circles represent the fitting residual, which has been smoothed with a short-term 200-day filter (dashed blue line) and long-term 667-day filter (red dashed line). The solid red line is the long-term trend  $F_T(t)$ , given by the linear component of the fitted function  $F(t)$  (equation 1) plus the residual filtered using the long-term filter. The solid blue line is the smoothed fitted curve  $F_S(t)$  given by  $F(t)$  plus the residual filtered using the short-term filter. Middle panel: The HCHO vertical column growth rate in  $10^{16}$  molecules  $\text{cm}^{-2} \text{yr}^{-1}$ , which is the derivative of the long-term trend  $F_T(t)$  shown in the top-panel. Bottom panel: the de-trended seasonal cycle  $F_C(t)$  which is the difference between the long-term trend and the smoothed function fit (i.e.  $F_S(t) - F_L(t)$ ). It represents the annual seasonal oscillation with any long-term trend removed. The dark grey filled circles are the fitted harmonic component of  $F(t)$ . At al-Wakrah ( $25.29^\circ\text{N}$ ,  $51.61^\circ\text{E}$ , population: 22712) there is a statistically significant large upward linear trend of  $0.22 \pm 0.05 \times 10^{15}$  molecules  $\text{cm}^{-2} \text{yr}^{-1}$ . This corresponds to a linear growth of  $4.61 \pm 0.94 \%$   $\text{yr}^{-1}$  relative to the observed 2005–2014 median VCD. In this example,  $|\omega/\sigma_\omega| = 4.9$  and the uncertainties of the trend ( $F_T$ ) and smoothed curves ( $F_S$ ) are about 4% and 6%, respectively. The median growth rate  $G$  is  $6.56 \pm 5.61 \%$   $\text{yr}^{-1}$ , whilst the mean seasonal amplitude is  $3.05 \pm 0.36 \times 10^{15}$  molecules  $\text{cm}^{-2}$  (about  $62.56 \pm 7.36\%$  relative to the median column). A similar analysis of the coincident time series of the HCHO AMF, cloud fraction, cloud-top pressure and number of samples, reveals no other significant trend. This indicates the upward growth in HCHO is not caused by a trend in any other retrieval parameter and is real at the 95% confidence level.

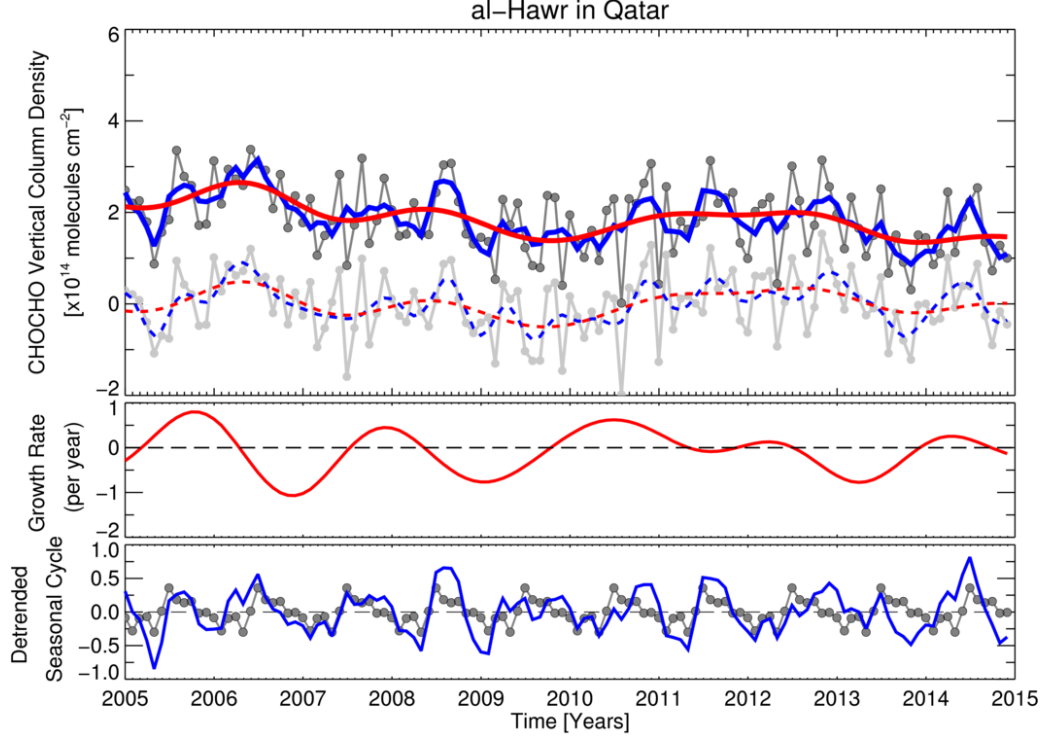

**Figure 2.** An example of a time series fit to observed CHOCHO data over al-Hawr (Qatar), as outlined in Section 3.3. Top panel: the monthly OMI CHOCHO vertical columns are indicated by dark grey filled circles, whilst the light grey filled circles represent the fitting residual, which has been smoothed with a short-term 200-day filter (dashed blue line) and long-term 667-day filter (red dashed line). The solid red line is the long-term trend  $F_T(t)$ , given by the linear component of the fitted function  $F(t)$  (equation 1) plus the residual filtered using the long-term filter. The solid blue lines is the smoothed fitted curve  $F_S(t)$  given by  $F(t)$  plus the residual filtered using the short-term filter. Middle panel: The CHOCHO vertical column growth rate in  $10^{14}$  molecules  $\text{cm}^{-2} \text{yr}^{-1}$ , which is the derivative of the long-term trend  $F_T(t)$  shown in the top-panel. Bottom panel: the de-trended seasonal cycle  $F_C(t)$  which is the difference between the long-term trend and the smoothed function fit (i.e.  $F_S(t) - F_L(t)$ ). It represents the annual seasonal oscillation with any long-term trend removed. The dark grey filled circles are the fitted harmonic components of  $F(t)$ . At al-Hawr ( $25.69^\circ\text{N}$ ,  $51.51^\circ\text{E}$ , population: 2736) there is a statistically significant downward linear trend of  $-0.83 \pm 0.23 \times 10^{13}$  molecules  $\text{cm}^{-2} \text{yr}^{-1}$ . This corresponds to a linear decrease of  $-4.58 \pm 1.26 \%$   $\text{yr}^{-1}$  relative to the observed 2005–2014 median VCD. In this example,  $|\omega/\sigma_\omega| = 2.0$  and the uncertainties of the trend ( $F_T$ ) and smoothed curves ( $F_S$ ) are about 10% and 16%, respectively. The median growth rate  $G$  is  $-0.89 \pm 13.88 \%$   $\text{yr}^{-1}$ , whilst the mean seasonal amplitude is  $9.50 \pm 3.35 \times 10^{13}$  molecules  $\text{cm}^{-2}$  (about  $52.12 \pm 18.41\%$  relative to the median column). A similar analysis of the coincident time series of the CHOCHO AMF, cloud fraction, cloud-top pressure and number of samples, reveals no other significant trend. This indicates the downward trend in CHOCHO is not caused by a trend in any other retrieval parameter and is real at the 95% confidence level.

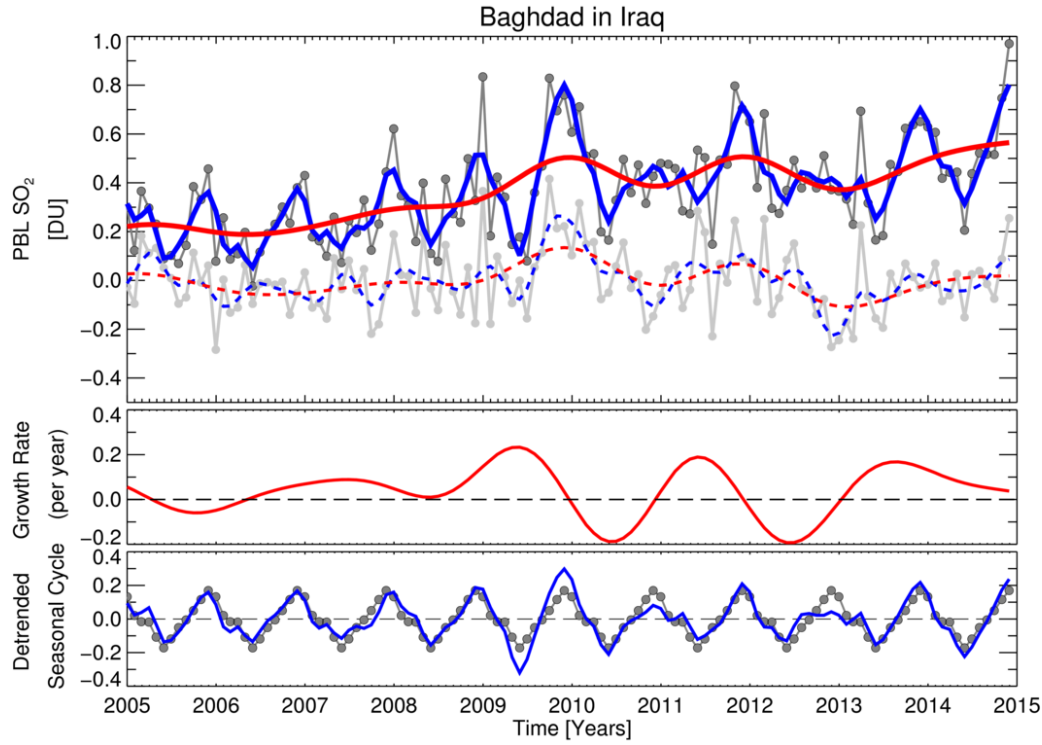

**Figure 3.** An example of a time series fit to observed  $\text{SO}_2$  data over Baghdad (Iraq), as outlined in Section 3.3. Top panel: the monthly OMI  $\text{SO}_2$  vertical columns are indicated by dark grey filled circles, whilst the light grey filled circles represent the fitting residual, which has been smoothed with a short-term 200 day filter (dashed blue line) and long-term 667 day filter (red dashed line). The solid red line is the long-term trend  $F_T(t)$ , given by the linear component of the fitted function  $F(t)$  (equation 1) plus the residual filtered using the long-term filter. The solid blue line is the smoothed fitted curve  $F_S(t)$  given by  $F(t)$  plus the residual filtered using the short-term filter. Middle panel: The  $\text{SO}_2$  vertical column growth rate in  $\text{DU yr}^{-1}$ , which is the derivative of the long-term trend  $F_T(t)$  shown in the top-panel. Bottom panel: the de-trended seasonal cycle  $F_C(t)$  which is the difference between the long-term trend and the smoothed function fit (i.e.  $F_S(t) - F_L(t)$ ). It represents the annual seasonal oscillation with any long-term trend removed. The dark grey filled circles are the fitted harmonic components of  $F(t)$ . At Baghdad ( $33.34^\circ\text{N}$ ,  $44.39^\circ\text{E}$ , population: 5511490) there is a statistically significant large upward linear trend of  $0.035 \pm 0.008 \text{ DU yr}^{-1}$ . This corresponds to a linear growth of  $9.78 \pm 2.25 \% \text{ yr}^{-1}$  relative to the observed 2005–2014 median VCD. In this example,  $|\omega/\sigma_\omega| = 4.4$  and the uncertainties of the trend ( $F_T$ ) and smoothed curves ( $F_S$ ) are about 9% and 15%, respectively. The median growth rate  $G$  is  $13.18 \pm 13.37 \% \text{ yr}^{-1}$ , whilst the mean seasonal amplitude is  $0.37 \pm 0.06 \text{ DU}$  (about  $102.78 \pm 17.78\%$  relative to the median column). A similar analysis of the coincident time series of the  $\text{SO}_2$  cloud fraction, cloud-top pressure and number of samples, reveals no other significant trend. This indicates the upward growth in  $\text{SO}_2$  is not caused by a trend in any other retrieval parameter and is real at the 95% confidence level.

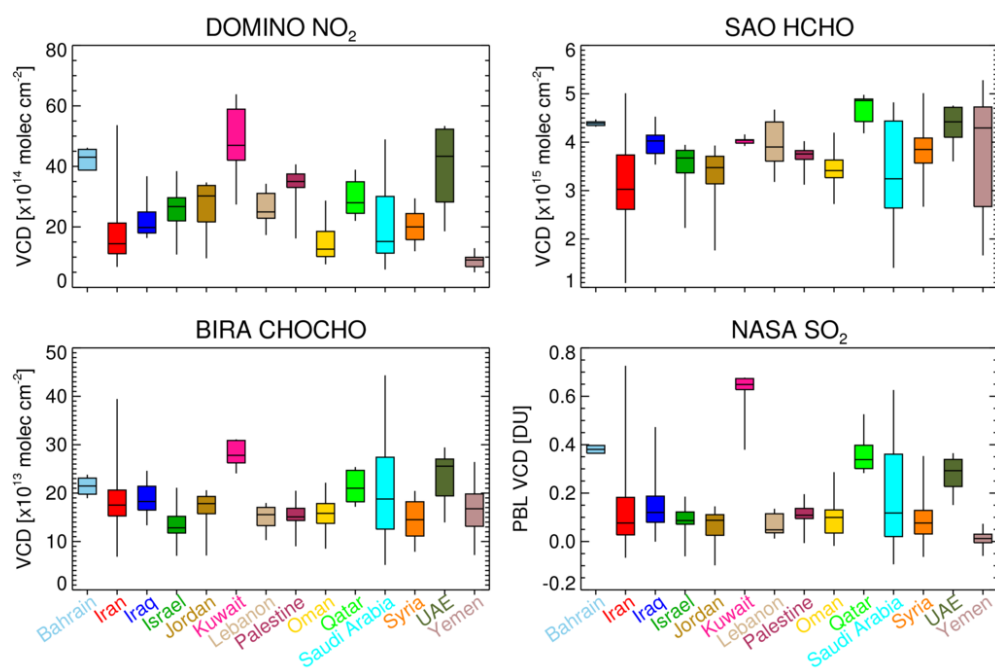

**Figure 4.** Box-and-whisker plots showing the minimum, 25<sup>th</sup> percentile, median, 75<sup>th</sup> percentile, and maximum values of the observed median vertical columns, for urban targets categorised by country.

### 3 Statistical Summaries

**Table 3.** The difference between the linear trend (in % yr<sup>-1</sup>) and inferred growth rates (in % yr<sup>-1</sup>) per species and target category.

| Species         | Urban  | Refinery | Ports | Plants |
|-----------------|--------|----------|-------|--------|
| NO <sub>2</sub> |        |          |       |        |
| Maximum         | 4.84   | 3.18     | 2.49  | 4.21   |
| Minimum         | -5.29  | -1.56    | -0.95 | -4.90  |
| Median          | -0.18  | -0.09    | -0.11 | 0.78   |
| HCHO            |        |          |       |        |
| Maximum         | 3.42   | 1.33     | 1.10  | 3.42   |
| Minimum         | -2.46  | 0.00     | -0.70 | -2.34  |
| Median          | -0.06  | 0.90     | 0.08  | -0.93  |
| SO <sub>2</sub> |        |          |       |        |
| Maximum         | 31.50  | 5.66     | 6.03  | 77.06  |
| Minimum         | -21.63 | -2.44    | -0.36 | -16.63 |
| Median          | 0.21   | -0.97    | 2.84  | 0.33   |
| CHOCHO          |        |          |       |        |
| Maximum         | -3.69  | -        | -     | 3.14   |
| Minimum         | -3.69  | -        | -     | 3.14   |
| Median          | -3.69  | -        | -     | 3.14   |

**Table 4.** Statistical summary of the DOMINO NO<sub>2</sub> vertical column density (VCD) analysis. Tests 1–6 are defined as follows: (1) construction of each 10 year time series using mask of  $\pm 4$  grid-cells ( $\sim 20$  km radius around each target), instead of the default  $\pm 2$  grid-cells ( $\sim 10$  km radius around each target), (2) use of cloud fraction filter of 40%, (3) use of unaffected OMI detector rows 5 to 23 only, (4) increased smoothing of gridded maps (spatial filter of  $0.35^\circ \times 0.35^\circ$  with a  $2\text{-}\sigma$  width), (5) no filtering for outliers in the time series analysis, (6) focus on only locations with  $>500,000$  people using a spatial mask of  $\pm 16$  grid-cells ( $\sim 80$  km radius around each target). Column headers are: n=number of locations with trends, n<sub>same</sub> number of same locations with trends as found in default analysis, n<sub>new</sub>= number of new locations trend found in the this test, and n<sub>miss</sub> is the number of locations from the original analysis that have not been detected.

| Test   | Urban Targets<br>(default=198) |                   |                  |                   | Refinery<br>default=17 |                   |                  |                   | Oil Ports<br>default=6 |                   |                  |                   | Power Plants<br>default=57 |                   |                  |                   |
|--------|--------------------------------|-------------------|------------------|-------------------|------------------------|-------------------|------------------|-------------------|------------------------|-------------------|------------------|-------------------|----------------------------|-------------------|------------------|-------------------|
|        | n                              | n <sub>same</sub> | n <sub>new</sub> | n <sub>miss</sub> | n                      | n <sub>same</sub> | n <sub>new</sub> | n <sub>miss</sub> | n                      | n <sub>same</sub> | n <sub>new</sub> | n <sub>miss</sub> | n                          | n <sub>same</sub> | n <sub>new</sub> | n <sub>miss</sub> |
| Test 1 | 220                            | 170               | 50               | 28                | 17                     | 14                | 3                | 3                 | 6                      | 5                 | 1                | 1                 | 69                         | 51                | 18               | 6                 |
| Test 2 | 165                            | 159               | 6                | 39                | 13                     | 13                | 0                | 4                 | 6                      | 6                 | 0                | 0                 | 49                         | 43                | 6                | 14                |
| Test 3 | 95                             | 57                | 38               | 141               | 6                      | 4                 | 2                | 13                | 5                      | 3                 | 2                | 3                 | 30                         | 14                | 16               | 43                |
| Test 4 | 207                            | 194               | 13               | 4                 | 15                     | 15                | 0                | 2                 | 6                      | 6                 | 0                | 0                 | 59                         | 56                | 3                | 1                 |
| Test 5 | 199                            | 172               | 27               | 26                | 16                     | 15                | 1                | 2                 | 6                      | 6                 | 0                | 0                 | 58                         | 52                | 6                | 5                 |
| Test 6 | 22                             | 12                | 10               | 186               | –                      | –                 | –                | –                 | –                      | –                 | –                | –                 | –                          | –                 | –                | –                 |

**Table 5.** Statistical summary of the SAO HCHO vertical column density (VCD) analysis. Tests 1–6 are defined as follows: ((1) construction of each 10 year time series using mask of  $\pm 4$  grid-cells ( $\sim 20$  km radius around each target), instead of the default  $\pm 2$  grid-cells ( $\sim 10$  km radius around each target), (2) use of cloud fraction filter of 40%, (3) use of unaffected OMI detector rows 5 to 23 only, (4) increased smoothing of gridded maps (spatial filter of  $0.35^\circ \times 0.35^\circ$  with a  $2\text{-}\sigma$  width), (5) no filtering for outliers in the time series analysis, (6) focus on only locations with  $>500,000$  people using a spatial mask of  $\pm 16$  grid-cells ( $\sim 80$  km radius around each target).. Column headers are: n=number of locations with trends, n<sub>same</sub> number of same locations with trends as found in default analysis, n<sub>new</sub>= number of new locations trend found in the this test, and n<sub>miss</sub> is the number of locations from the original analysis that have not been detected.

| Test   | Urban Targets<br>(default=34) |                   |                  |                   | Refinery<br>default=6 |                   |                  |                   | Oil Ports<br>default=4 |                   |                  |                   | Power Plants<br>default=26 |                   |                  |                   |
|--------|-------------------------------|-------------------|------------------|-------------------|-----------------------|-------------------|------------------|-------------------|------------------------|-------------------|------------------|-------------------|----------------------------|-------------------|------------------|-------------------|
|        | n                             | n <sub>same</sub> | n <sub>new</sub> | n <sub>miss</sub> | n                     | n <sub>same</sub> | n <sub>new</sub> | n <sub>miss</sub> | n                      | n <sub>same</sub> | n <sub>new</sub> | n <sub>miss</sub> | n                          | n <sub>same</sub> | n <sub>new</sub> | n <sub>miss</sub> |
| Test 1 | 46                            | 29                | 17               | 5                 | 7                     | 6                 | 1                | 0                 | 8                      | 4                 | 4                | 0                 | 34                         | 21                | 13               | 5                 |
| Test 2 | 34                            | 27                | 7                | 7                 | 3                     | 3                 | 0                | 3                 | 4                      | 3                 | 1                | 1                 | 27                         | 22                | 5                | 4                 |
| Test 3 | 19                            | 7                 | 12               | 27                | 4                     | 3                 | 1                | 3                 | 1                      | 1                 | 0                | 3                 | 14                         | 10                | 4                | 16                |
| Test 4 | 43                            | 33                | 10               | 1                 | 6                     | 6                 | 0                | 0                 | 5                      | 4                 | 1                | 0                 | 33                         | 26                | 7                | 0                 |
| Test 5 | 33                            | 31                | 2                | 3                 | 6                     | 6                 | 0                | 0                 | 4                      | 4                 | 0                | 0                 | 29                         | 25                | 4                | 1                 |
| Test 6 | 9                             | 3                 | 6                | 31                | –                     | –                 | –                | –                 | –                      | –                 | –                | –                 | –                          | –                 | –                | –                 |

**Table 6.** Statistical summary of the NASA SO<sub>2</sub> vertical column density (VCD) analysis, tests 1–6 are defined as follows: (1) construction of each 10 year time series using mask of  $\pm 4$  grid-cells ( $\sim 20$  km radius around each target), instead of the default  $\pm 2$  grid-cells ( $\sim 10$  km radius around each target), (2) use of cloud fraction filter of 40%, (3) use of unaffected OMI detector rows 5 to 23 only, (4) increased smoothing of gridded maps (spatial filter of  $0.35^\circ \times 0.35^\circ$  with a  $2\text{-}\sigma$  width), (5) no filtering for outliers in the time series analysis, (6) focus on only locations with  $>500,000$  people using a spatial mask of  $\pm 16$  grid-cells ( $\sim 80$  km radius around each target).. Note that test 2 (different cloud fraction filtering) was not applied to the SO<sub>2</sub> data. Column headers are: n=number of locations with trends, n<sub>same</sub> number of same locations with trends as found in default analysis, n<sub>new</sub>= number of new locations trend found in the this test, and n<sub>miss</sub> is the number of locations from the original analysis that have not been detected.

| Test   | Urban Targets<br>(default=18) |                   |                  |                   | Refinery<br>(default=3) |                   |                  |                   | Oil Ports<br>(default=2) |                   |                  |                   | Power Plants<br>(default=9) |                   |                  |                   |
|--------|-------------------------------|-------------------|------------------|-------------------|-------------------------|-------------------|------------------|-------------------|--------------------------|-------------------|------------------|-------------------|-----------------------------|-------------------|------------------|-------------------|
|        | n                             | n <sub>same</sub> | n <sub>new</sub> | n <sub>miss</sub> | n                       | n <sub>same</sub> | n <sub>new</sub> | n <sub>miss</sub> | n                        | n <sub>same</sub> | n <sub>new</sub> | n <sub>miss</sub> | n                           | n <sub>same</sub> | n <sub>new</sub> | n <sub>miss</sub> |
| Test 1 | 18                            | 9                 | 9                | 9                 | 3                       | 3                 | 0                | 0                 | 3                        | 1                 | 2                | 1                 | 9                           | 6                 | 3                | 3                 |
| Test 3 | 13                            | 8                 | 5                | 10                | 1                       | 1                 | 0                | 2                 | 1                        | 1                 | 0                | 1                 | 10                          | 5                 | 5                | 4                 |
| Test 4 | 17                            | 17                | 0                | 1                 | 3                       | 3                 | 0                | 0                 | 3                        | 2                 | 1                | 0                 | 9                           | 8                 | 1                | 1                 |
| Test 5 | 14                            | 11                | 3                | 7                 | 2                       | 2                 | 0                | 1                 | 1                        | 1                 | 0                | 1                 | 4                           | 3                 | 1                | 6                 |
| Test 6 | 3                             | 1                 | 2                | 17                | –                       | –                 | –                | –                 | –                        | –                 | –                | –                 | –                           | –                 | –                | –                 |

**Table 7.** Statistical summary of the BIRA CHOCHO vertical column density (VCD) analysis, tests 1–5 are defined as follows: (1) construction of each 10 year time series using mask of  $\pm 4$  grid-cells ( $\sim 20$  km radius around each target), instead of the default  $\pm 2$  grid-cells ( $\sim 10$  km radius around each target), (2) use of cloud fraction filter of 40%, (3) use of unaffected OMI detector rows 5 to 23 only, (4) increased smoothing of gridded maps (spatial filter of  $0.35^\circ \times 0.35^\circ$  with a  $2\text{-}\sigma$  width), (5) no filtering for outliers in the time series analysis, (6) focus on only locations with  $>500,000$  people using a spatial mask of  $\pm 16$  grid-cells ( $\sim 80$  km radius around each target). Note that test 2 (different cloud fraction filtering) was not applied to the SO<sub>2</sub> data. Column headers are: n=number of locations with trends, n<sub>same</sub> number of same locations with trends as found in default analysis, n<sub>new</sub>= number of new locations trend found in the this test, and n<sub>miss</sub> is the number of locations from the original analysis that have not been detected.

| Test   | Urban Targets<br>(default=1) |                   |                  |                   | Refinery<br>(default=0) |                   |                  |                   | Oil Ports<br>(default=0) |                   |                  |                   | Power Plants<br>(default=1) |                   |                  |                   |
|--------|------------------------------|-------------------|------------------|-------------------|-------------------------|-------------------|------------------|-------------------|--------------------------|-------------------|------------------|-------------------|-----------------------------|-------------------|------------------|-------------------|
|        | n                            | n <sub>same</sub> | n <sub>new</sub> | n <sub>miss</sub> | n                       | n <sub>same</sub> | n <sub>new</sub> | n <sub>miss</sub> | n                        | n <sub>same</sub> | n <sub>new</sub> | n <sub>miss</sub> | n                           | n <sub>same</sub> | n <sub>new</sub> | n <sub>miss</sub> |
| Test 1 | 2                            | 1                 | 1                | 0                 | 1                       | 0                 | 1                | 0                 | 0                        | 0                 | 0                | 1                 | 1                           | 1                 | 0                | 0                 |
| Test 3 | 2                            | 0                 | 2                | 1                 | 0                       | 0                 | 0                | 0                 | 0                        | 0                 | 0                | 0                 | 0                           | 0                 | 0                | 1                 |
| Test 4 | 2                            | 1                 | 1                | 0                 | 0                       | 0                 | 0                | 0                 | 0                        | 0                 | 0                | 0                 | 1                           | 1                 | 0                | 0                 |
| Test 5 | 1                            | 0                 | 1                | 0                 | 0                       | 0                 | 0                | 0                 | 0                        | 0                 | 0                | 0                 | 3                           | 1                 | 2                | 0                 |
| Test 6 | 0                            | 0                 | 0                | 0                 | –                       | –                 | –                | –                 | –                        | –                 | –                | –                 | –                           | –                 | –                | –                 |



## References

- 10 Kootungal, L.: 2010 WorldWide Refining Survery, Oil & Gas Journal, 6, 2010.
