# Supplementary material for: OMI air-quality monitoring over the Middle East
Source: Copernicus journal article supplement (doi:10.5194/acp-2016-784), 2016-10-04
Supplement: Supplementary file 1 [file TABLE-S1-RANKED-POLLUTION-LEVELS.xlsx]

## Sheet: (a) NO2-Urban
Table 1(a) The 50 highest ranked DOMINO NO2 median vertical column densities (VCD) found over urban locations for 2005--2014. Linear trends are deemed significant if |ω/σω | > 2, and real if no statistically significant trends are observed in either the air mass factor, cloud fraction, cloud-top pressure, or number of samples. Percentage linear trends are given relative to the observed median VCD.
					Vertical Column Density [x1014 molecules cm-2]
Rank	Settlement	Country	Longitude	Latitude	Median	Seasonal	Linear Trend
			[degrees]		VCD	Amplitude	ω	in %	Significant?	Real?	Population
1	Funtas	Kuwait	48.12	29.17	63.82	21.82	3.14	4.91	Y	N	17067
2	Subahiya	Kuwait	48.11	29.12	62.69	19.97	2.98	4.76	Y	N	66514
-	Reqa	Kuwait	48.11	29.15	62.69	19.97	2.98	4.76	Y	N	38519
-	Mahboola	Kuwait	48.12	29.15	62.69	19.97	2.98	4.76	Y	N	13447
-	Abu Halifa	Kuwait	48.12	29.14	62.69	19.97	2.98	4.76	Y	N	21433
6	Jabber-Al-Ali	Kuwait	48.08	29.17	59.24	18.49	2.15	3.63	Y	N	28134
7	Mangaf	Kuwait	48.13	29.1	58.92	18.84	2.58	4.38	Y	N	28869
-	Fahaheel	Kuwait	48.13	29.08	58.92	18.84	2.58	4.38	Y	N	50520
9	al-Ahmadi	Kuwait	48.08	29.07	53.98	18.07	1.5	2.78	Y	N	28303
10	Subbah Al-Salem	Kuwait	48.06	29.26	53.89	17.47	2.22	4.11	Y	N	71602
-	Salwa	Kuwait	48.08	29.3	53.89	17.47	2.22	4.11	Y	N	47528
12	Tehran	Iran	51.42	35.67	53.61	38.88	1.75	3.26	Y	Y	6994399
13	Sharjah	UAE	55.39	25.36	53.35	19.84	0.1	0.18	N	N	421325
14	Ajman	UAE	55.44	25.41	52.33	19.91	0.43	0.82	N	N	150572
15	Dubai	UAE	55.28	25.25	52.26	20.39	0.29	0.56	N	Y	880809
16	Shahriyar	Iran	51.06	35.66	50.83	31.77	1.9	3.75	Y	Y	47489
17	Dhahran	Saudi Arabia	50.13	26.3	48.91	11.97	1.25	2.55	Y	Y	94591
18	Eslamshahr	Iran	51.26	35.56	48.84	32.58	1.15	2.35	N	Y	297516
19	Attuqbah	Saudi Arabia	50.2	26.27	48.65	13.54	1.3	2.67	Y	Y	161287
20	Addammam	Saudi Arabia	50.11	26.43	48.63	10.8	0.99	2.04	Y	Y	619117
21	Salmiya	Kuwait	48.08	29.33	48.46	17.11	2.3	4.75	Y	N	171391
-	Rimaithiya	Kuwait	48.07	29.31	48.46	17.11	2.3	4.75	Y	N	37239
23	al-Khobar	Saudi Arabia	50.2	26.23	48.28	15.03	1.35	2.8	Y	N	181867
24	Karaj	Iran	50.97	35.8	47.29	35.05	1.55	3.27	Y	Y	1041217
25	Abrak Kheetan	Kuwait	47.97	29.29	46.95	15.01	1.24	2.64	Y	N	38437
26	Tarut	Saudi Arabia	50.06	26.57	46.94	11.35	0.42	0.89	N	Y	48848
27	Sayhat	Saudi Arabia	50.04	26.48	46.65	9.65	0.73	1.56	N	Y	74527
28	al Qatif	Saudi Arabia	50.02	26.52	46.6	10.12	0.68	1.46	N	Y	126975
29	ar-Rifa	Bahrain	50.56	26.13	46.16	12.9	-0.26	-0.56	N	N	76276
30	Safwah	Saudi Arabia	49.96	26.65	45.87	11.86	0.57	1.25	N	Y	47864
31	Isa	Bahrain	50.55	26.17	45.63	12.31	-0.06	-0.14	N	N	36594
32	Jabriya	Kuwait	48.02	29.32	45.06	15.48	1.89	4.2	Y	N	39978
-	Hawalli	Kuwait	48.03	29.33	45.06	15.48	1.89	4.2	Y	N	108242
-	Bayan	Kuwait	48.04	29.32	45.06	15.48	1.89	4.2	Y	N	35561
35	Umm al-Qaywayn	UAE	55.55	25.57	44.72	21.63	0.92	2.06	N	Y	32974
36	Jidd Hafs	Bahrain	50.55	26.22	44.02	10.53	0.17	0.39	N	N	10840
37	Jaleeb Al-Shuyukh	Kuwait	47.94	29.27	43.47	13.62	0.99	2.27	Y	N	134488
-	Farwaniya	Kuwait	47.91	29.27	43.47	13.62	0.99	2.27	Y	N	69891
39	Ras Al Khaimah	UAE	55.94	25.79	43.34	15.44	0.87	2	N	Y	102075
40	Sitrah	Bahrain	50.62	26.15	43.03	13.41	0.11	0.25	N	N	51670
41	al-Manamah	Bahrain	50.58	26.24	42.94	12.59	0.24	0.55	N	N	133523
42	Rawda	Kuwait	47.98	29.34	42.04	13.74	1.49	3.53	Y	N	19006
-	al-Kuwayt	Kuwait	47.98	29.33	42.04	13.74	1.49	3.53	Y	N	37837
-	Keefan	Kuwait	47.96	29.34	42.04	13.74	1.49	3.53	Y	N	17205
-	Faiha	Kuwait	47.97	29.34	42.04	13.74	1.49	3.53	Y	N	12523
46	Rahimah	Saudi Arabia	50.06	26.71	41.66	14.4	0.45	1.08	N	Y	58367
47	Esfahan	Iran	51.68	32.68	41.27	24.48	1.33	3.22	Y	Y	1389558
48	Rabia	Kuwait	47.9	29.29	40.78	12.67	0.95	2.32	Y	Y	29439
-	Ardiya	Kuwait	47.88	29.29	40.78	12.67	0.95	2.32	Y	Y	44485
50	Saffa	OPT	35.07	31.9	40.64	16.66	0.12	0.29	N	Y	3131

## Sheet: (b) NO2-Oil-Refinery
Table 1(b) The 50 highest ranked DOMINO NO2 median vertical column densities (VCD) found over oil refineries for 2005--2014. Linear trends are deemed significant if |ω/σω | > 2, and real if no statistically significant trends are observed in either the air mass factor, cloud fraction, cloud-top pressure, or number of samples. Percentage linear trends are given relative to the observed median VCD.
						Vertical Column Density [x1014 molecules cm-2]
Rank	Reinfery	Location	Country	Longitude	Latitude	Median	Seasonal	Linear Trend
				[degrees]		VCD	Amplitude	ω	in %	Significant?	Real?	Capacity
1	Kuwait National Petroleum Co.	Shuaiba	Kuwait	48.13	29.02	55.07	18.77	2.28	4.14	Y	N	200000
-	Kuwait National Petroleum Co.	Mina Al-Ahmadi	Kuwait	48.13	29	55.07	18.77	2.28	4.14	Y	N	466000
3	Sharjah Oil Refining Co.	Hamriyah	UAE	55.48	25.45	54.43	19.07	0.61	1.12	N	N	71250
4	Kuwait National Petroleum Co.	Mina Abdulla	Kuwait	48.15	29	50.74	18.41	2.08	4.1	Y	N	270000
5	Midland Refineries Co.	Daura	Iraq	44.42	33.27	46.82	13.98	2.65	5.66	Y	Y	110000
6	National Iranian Oil Co.	Tehran	Iran	51.42	35.53	45.78	33.05	1.57	3.43	Y	Y	220000
7	Bahrain Petroleum Co.	Sitra	Bahrain	50.6	26.1	44.52	16.59	-0.23	-0.51	N	N	253650
8	Saudi Arabian Oil Co.	Ras Tanura	Saudi Arabia	50.08	26.7	41.66	14.4	0.45	1.08	N	Y	550000
9	Emirates National Oil Co.	Jebel Ali	UAE	55.01	25	37.2	16.52	0.9	2.41	Y	Y	120000
10	National Iranian Oil Co.	Isfahan	Iran	51.5	32.76	36.32	26.87	1.35	3.72	Y	Y	284000
11	Saudi Arabian Oil Co.	Riydah	Saudi Arabia	46.87	24.52	34.86	31.7	1.13	3.25	Y	Y	120000
12	Saudi Aramco Shell Refinery Co.	Al-Jubail	Saudi Arabia	49.57	27.03	34.56	9.02	1.3	3.78	Y	Y	290000
13	Takreer	Umm Al-Nar	UAE	54.48	24.42	31.91	13.57	0.67	2.09	Y	Y	150000
14	Jordan Petroleum Refinery	Zarqa	Jordan	36.1	32.12	31.27	5.92	0.63	2.01	Y	Y	90400
15	Fujairah Refinery Co.	Fujairah	UAE	56.35	25.18	30.48	13.15	1.16	3.82	Y	N	82000
16	Saudi Arabian Oil Co.	Jeddah	Saudi Arabia	39.18	21.42	29.46	13.35	1.11	3.77	Y	N	85000
17	National Iranian Oil Co.	Abadan	Iran	48.27	30.35	28.82	15.92	2.02	7.01	Y	N	350000
18	Oil Refineries Administration	Basra	Iraq	47.82	30.53	27.55	10.27	1.79	6.5	Y	N	150000
19	National Oil Distribution Co	Umm Said	Qatar	51.53	24.95	27.49	14.47	0.96	3.5	Y	N	200000
20	Laffan Refinery Co. Ltd.	Ras Laffan	Qatar	51.57	25.9	27.49	10.56	0.89	3.22	Y	N	138700
21	Oil Refineries Lim.	Ashdod	Israel	34.67	31.83	27.1	13.97	0.45	1.66	N	Y	90000
22	Iraq Co. for Oil Operations	Kirkuk	Iraq	44.33	35.52	26.74	17.43	1.57	5.88	Y	Y	2000
23	National Iranian Oil Co.	Shiraz	Iran	52.65	29.73	25.31	14.06	0.48	1.9	N	Y	40000
24	Oil Refineries Lim.	Haifa	Israel	34.51	31.62	25.01	7.44	0.2	0.82	N	Y	130000
25	Homs Refinery Co.	Homs	Syria	36.63	34.72	23.75	10.98	0.23	0.95	N	Y	105140
26	National Iranian Oil Co.	Tarbiz	Iran	46.15	38.05	22.74	11.86	0.6	2.62	Y	Y	100000
27	National Iranian Oil Co.	Bandar Abbas	Iran	56.07	27.17	20.64	5.18	0.99	4.8	Y	N	232000
28	Oil Refineries Administration	K3-Haditha	Iraq	44.35	34.07	20.37	8.73	0.65	3.17	Y	N	7000
29	Oil Refineries Administration	Mufthia	Iraq	44.12	33.65	20.24	4.62	0.84	4.13	Y	Y	4500
30	Oman reinfery Co.	Mina ak Fahal	Oman	58.5	23.62	20.13	4.93	0.58	2.87	Y	Y	85000
31	Oil Refineries Administration	Bajii	Iraq	43.48	35	20.01	10.21	0.69	3.46	Y	Y	310000
32	Takreer	Ruwais	UAE	52.72	24.12	19.59	7.46	1.03	5.28	Y	Y	350000
33	Saudi Arabian Oil Co.	Yanbuh	Saudi Arabia	38.23	23.96	19.12	4.5	0.81	4.23	Y	N	235000
34	Saudi Aramco Mobil	Yanbuh	Saudi Arabia	38.3	23.93	19.02	4.5	0.83	4.38	Y	N	400000
35	National Iranian Oil Co.	Arak	Iran	49.47	34	18.53	13.71	0.78	4.21	Y	Y	170000
36	Oil Refineries Administration	Qaiyarah	Iraq	43.28	35.78	17.67	11	0.53	3.01	Y	N	2000
37	National Iranian Oil Co.	Lavan Island	Iran	53.34	26.78	17.41	6.94	0.64	3.67	Y	Y	30000
38	Saudi Arabian Oil Co.	Rabigh	Saudi Arabia	39	22.72	17.22	6.59	0.67	3.88	Y	N	400000
39	Baniasa Refining Co.	Banias	Syria	35.95	35.13	15.76	11.18	0.29	1.86	N	N	132725
40	National Iranian Oil Co.	Kermanshah	Iran	47.1	34.2	13.39	8.47	0.57	4.26	Y	Y	25000
41	Aden Refinery Co.	Little Adeb	Yemen	44.87	12.75	10.08	3.28	0.11	1.13	N	N	130000

## Sheet: (c) NO2-Oil-Port
Table 1(c) The 50 highest ranked DOMINO NO2 median vertical column densities (VCD) found over oil ports for 2005--2014. Linear trends are deemed significant if |ω/σω | > 2, and real if no statistically significant trends are observed in either the air mass factor, cloud fraction, cloud-top pressure, or number of samples. Percentage linear trends are given relative to the observed median VCD.
						Vertical Column Density [x1014 molecules cm-2]
Rank	Port	Location	Country	Longitude	Latitude	Median	Seasonal	Linear Trend
				[degrees]		VCD	Amplitude	ω	in %	Significant?	Real?
1	Mina Al-Ahmadi	Al Ahmadi	Kuwait	48.16	29.05	64.11	21.3	3.35	5.23	Y	N
2	Sharjah	Sharjah	UAE	55.48	25.47	50.19	19.65	0.74	1.48	N	N
3	Sitrah	Bahrain	Bahrain	50.67	26.16	40.68	12.36	0.26	0.65	N	Y
4	Jebel Ali	Dubay	UAE	55.06	25	40.33	18.5	1.11	2.74	Y	Y
5	Zubayr Terminal	Al-Basrah	Iraq	47.91	30.13	34.27	11.8	3.03	8.86	Y	Y
6	Umm Qasr	Al-Basrah	Iraq	47.95	30.03	33.33	11.29	3.12	9.37	Y	Y
7	Umm Al-Narr	Abu Dhabi	UAE	54.5	24.45	32.66	14	0.74	2.26	Y	Y
8	Fujairah	Fujayrah	UAE	56.37	25.2	31.79	13.12	1.22	3.84	Y	N
9	Abadan	Khuzestan	Iran	48.28	30.33	28.82	15.92	2.02	7.01	Y	N
10	Basrah	Al-Basrah	Iraq	47.83	30.54	27.55	10.27	1.79	6.5	Y	N
11	Ras Laffan	Al Khawr	Qatar	51.61	25.93	26.67	9.4	0.88	3.31	Y	N
12	Bandar-e Khomeni (BIK)	Khuzestan	Iran	49.09	30.42	26.03	8.58	0.95	3.67	Y	Y
13	Ashdod	HaDarom	Israel	34.64	31.82	25.15	13.3	0.28	1.11	N	Y
14	Jeddah Terminal	Mecca	Saudi Arabia	39.53	20.67	23.75	11.87	0.69	2.9	Y	N
15	Ashqelon Jetty	HaDarom	Israel	34.5	31.63	23.17	7.37	-0.01	-0.04	N	Y
16	Dogerdan	Hormozgan	Iran	56.11	27.13	20.45	5.76	0.98	4.81	Y	N
17	Al-Ruwais	Abu Dhabi	UAE	52.72	24.16	19.23	7.05	0.99	5.15	Y	Y
18	National Iranian Oil Co.	Kharg Island	Iran	50.3	29.23	17.31	10.79	0.26	1.53	N	Y

## Sheet: (d) NO2-Power-Plant
Table 1(d) The 50 highest ranked DOMINO NO2 median vertical column densities (VCD) found over power plants for 2005--2014. Linear trends are deemed significant if |ω/σω | > 2, and real if no statistically significant trends are observed in either the air mass factor, cloud fraction, cloud-top pressure, or number of samples. Percentage linear trends are given relative to the observed median VCD.
						Vertical Column Density [x1014 molecules cm-2]
Rank	Reinfery	Location	Country	Longitude	Latitude	Median	Seasonal	Linear Trend				Plant
				[degrees]		VCD	Amplitude	ω	in %	Significant?	Real?	Fuel	Capacity
1	Tarasht (Shahid Firouzi)	Tehran	Iran	51.35	35.72	74.18	66.32	1.75	2.35	N	Y	Gas	50MW
2	Besat	Tehran	Iran	51.43	35.64	60.95	46.32	2.29	3.76	Y	Y	Oil	247.5MW
3	Shuiba North CCGT and South	Shuiba	Kuwait	48.15	29.04	60.73	19.97	3.19	5.25	Y	N	Gas	1680MW
4	Az Zour South	Mina Said	Kuwait	48.37	28.7	53.04	28.1	3.34	6.29	Y	N	Gas	2536MW
-	Az Zour South (ZSPS)	Mina Said	Kuwait	48.37	28.71	53.04	28.1	3.34	6.29	Y	N	Oil	2400MW
6	Montazare Ghaem CCGT	Karaj	Iran	51.01	35.73	50.09	34.08	1.78	3.55	Y	Y	Gas	997.5MW
7	Ameer I II III OCGT	Dubai	UAE	55.42	25.15	46.64	21.13	0.18	0.39	N	Y	Gas	1844MW
8	Riyadh PP4 Oil GT	Riyadh	Saudi Arabia	46.67	24.65	45.82	25.79	1.29	2.82	Y	Y	Gas	65MW
9	Rey OCGT	Tehran	Iran	51.41	35.52	45.78	33.05	1.57	3.43	Y	Y	Gas	1171MW
10	Multiple Plants	Bahrain Area	Bahrain	50.6	26.1	44.52	16.59	-0.23	-0.51	N	N	Both	5989MW
11	Shahid Montazare Ghaem	Karaj	Iran	51	35.73	43.77	31.82	1.35	3.07	Y	Y	Oil	625.88MW
12	Dubai Aluminium CCGT	Dubai City	UAE	55.09	25.03	40.33	18.5	1.11	2.74	Y	Y	Gas	2000MW
13	Gazlan I and II	Ras Tanura	Saudi Arabia	49.9	26.85	39.92	10.93	0.75	1.88	Y	Y	Gas	4528MW
14	Shuwaikh Peak	Shuwaikh	Kuwait	47.94	29.35	39.71	12.52	1.18	2.97	Y	N	Gas	240MW
15	Ras Abu Fontas OCGT Complex	Doha	Qatar	51.62	25.2	38.9	13.53	1.43	3.68	Y	N	Gas	2178MW
16	Tihama Ras Tanura GT	Ras Tanura	Saudi Arabia	50	26.8	38.56	14.43	0.56	1.46	N	Y	Gas	148MW
17	Har Tuv GT	Beit Shemesh Zone	Israel	35	31.77	37.92	17.09	0.2	0.53	N	N	Gas	40MW
18	Doha South Super GT	Doha	Qatar	51.52	25.19	37.82	13.43	1.25	3.29	Y	N	Gas	67MW
19	Shahid Mohammed Montazeri	Esfahan	Iran	51.49	32.8	36.32	26.87	1.35	3.72	Y	Y	Oil	1600MW
20	Gezer GT and GCCT	Ramla	Israel	34.91	31.91	36.07	20.92	0.59	1.62	N	N	Gas	1336MW
21	Riyadh PP8 A GT	Riyadh	Saudi Arabia	46.57	24.6	34.14	28.9	0.91	2.68	Y	Y	Gas	1000MW
22	Qurayyah	Eastern Province	Saudi Arabia	50.12	25.86	34.13	18.66	1	2.93	Y	N	Oil	2500MW
23	Zouk	Beirut	Lebanon	35.6	33.97	34.05	14.46	1.56	4.59	Y	Y	Oil	607MW
24	Al Wajbha GT	Al Wajbha	Qatar	51.4	25.3	34.04	11.46	0.94	2.77	Y	Y	Gas	301MW
25	Fujairah (Qidfa) 1 Cogen CCGT	Qidfa	UAE	56.37	25.31	33.87	12.65	1.31	3.88	Y	N	Gas	881MW
26	Alon Tavor GT	Alon Tavor	Israel	35.37	32.63	33.53	14.89	-0.1	-0.3	N	Y	Gas	220MW
-	Alon Tavor CCGT	Alan Tavor	Israel	35.37	32.63	33.53	14.89	-0.1	-0.3	N	Y	Gas	373MW
28	Riyadh PP5 Oil GT	Riyadh	Saudi Arabia	46.59	24.76	33.4	14.12	0.83	2.48	Y	Y	Oil	528MW
29	Al Saliyah GT	Ar Rayyan	Qatar	51.39	25.21	33.13	11.45	0.95	2.88	Y	N	Gas	134MW
30	Marafiq Jubail IWPP	Jubail Industrial Area	Saudi Arabia	49.61	27.07	32.68	11.12	1.38	4.23	Y	Y	Gas	2745MW
31	Tzafit GT	HaDarom	Israel	34.84	31.71	32.6	13.89	0.47	1.46	N	Y	Gas	220MW
32	Sabiya CCGT and OCGT	Subiyah	Kuwait	48.18	29.56	32.56	11.09	2.65	8.13	Y	Y	Gas	1820MW
-	Sabiya I	Qasr as Sabiyah	Kuwait	48.17	29.57	32.56	11.09	2.65	8.13	Y	Y	Oil	2400MW
34	Ahwaz (Ramin)	Kuzestan	Iran	48.88	31.5	32.54	11.02	0.91	2.8	Y	Y	Oil	1890MW
35	Qurayyah ll CCGT	Ash Sharqiyah	Saudi Arabia	50.13	25.83	32.4	18.67	1	3.08	Y	N	Gas	3777MW
36	Zargan	Khuzestan	Iran	48.77	31.37	32.34	10.44	0.89	2.74	Y	Y	Gas	418MW
37	Shahid Rajaee	Qazvin	Iran	50.3	36.16	32.33	20.66	0.65	2.01	N	Y	Gas	1000MW
-	Shahid Rajaee CCGT Iran	Qazvin	Iran	50.28	36.15	32.33	20.66	0.65	2.01	N	Y	Gas	1042.8MW
39	Khor Al Zubayr OCGT	Basra	Iraq	47.82	30.21	32.03	10.13	2.62	8.18	Y	Y	Gas	252MW
40	UAN Cogen CCGT Complex	Abu Dhabi City	UAE	54.48	24.44	31.91	13.57	0.67	2.09	Y	Y	Gas	2746MW
41	Eitan GT	Moshav Eitan	Israel	34.75	31.58	31.2	10.11	0.59	1.9	Y	Y	Gas	40MW
42	Mesaieed CCGT	Mesaieed	Qatar	51.58	24.98	31.2	13.57	1.12	3.6	Y	N	Gas	2007MW
-	Qatalum CCGT	Masaieed	Qatar	51.58	24.97	31.2	13.57	1.12	3.6	Y	N	Gas	1350MW
44	Hussein	Al Zarqa	Jordan	36.12	32.12	30.79	6.94	1.02	3.3	Y	Y	Oil	382MW
-	Samra CCGT Jordan	Al Zarqa	Jordan	36.14	32.14	30.79	6.94	1.02	3.3	Y	Y	Gas	1031MW
46	Mecca OCGT	Mecca	Saudi Arabia	39.8	21.47	30	12.72	0.82	2.74	Y	N	Gas	780MW
47	Parand	Tehran	Iran	51.01	35.46	29.88	16.94	1.05	3.51	Y	Y	Gas	960MW
48	Doha East and West (OCGT)	Al Jahra	Kuwait	47.79	29.37	29.79	9.51	0.9	3.02	Y	Y	Both	3999MW
49	Jeddah PP2 and PP3C OCGT Complex	Jeddah	Saudi Arabia	39.19	21.44	29.46	13.35	1.11	3.77	Y	N	Gas	611MW
50	Mobin Petroshimi OCGT CHP	Bushehr	Iran	52.55	27.55	29.38	12.52	1.73	5.88	Y	Y	Gas	738MW

## Sheet: (e) HCHO-Urban
Table 1(e) The 50 highest ranked SAO HCHO median vertical column densities (VCD) found over urban locations for 2005--2014. Linear trends are deemed significant if |ω/σω | > 2, and real if no statistically significant trends are observed in either the air mass factor, cloud fraction, cloud-top pressure, or number of samples. Percentage linear trends are given relative to the observed median VCD.
					Vertical Column Density [x1015 molecules cm-2]
Rank	Settlement	Country	Longitude	Latitude	Median	Seasonal	Linear Trend
			[degrees]		VCD	Amplitude	ω	in %	Significant?	Real?	Population
1	al-Marawiah	Yemen	43.15	14.83	5.28	2.18	0.06	1.07	N	N	41419
2	Bayt-al-Faqih	Yemen	43.32	14.52	5.24	1.86	0.04	0.82	N	N	39068
3	Bajil	Yemen	43.28	15.07	5.23	1.41	0.04	0.83	N	N	55075
4	Zabid	Yemen	43.32	14.19	5.04	1.63	-0.04	-0.72	N	N	60069
5	Al-Hudaydah	Yemen	42.95	14.8	5.03	1.78	0.08	1.67	N	N	405248
6	Latakia	Syria	35.78	35.52	5.01	4.41	0.04	0.88	N	N	368230
7	Bandar Khomeyni	Iran	49.11	30.44	5.01	4.13	0.11	2.11	N	Y	55101
8	Ar-Rayyan	Qatar	51.42	25.29	4.98	3.25	0.18	3.7	Y	Y	176850
9	Jableh	Syria	35.94	35.35	4.97	3.97	0.08	1.54	N	N	47665
10	Rasht	Iran	49.59	37.28	4.96	3.99	-0.01	-0.1	N	Y	491827
11	Someh Sara	Iran	49.32	37.28	4.95	4.18	0.06	1.24	N	Y	33596
12	Al-Mukha	Yemen	43.25	13.32	4.93	1.51	0.05	1.07	N	Y	14060
13	Musayid	Qatar	51.55	25	4.92	3.25	0.17	3.46	Y	N	7835
14	Al-Mahwit	Yemen	43.55	15.47	4.89	1.85	0.15	3.05	Y	N	12301
15	Doha	Qatar	51.53	25.29	4.88	3.23	0.21	4.21	Y	Y	278409
16	Mah-Shahr	Iran	49.22	30.65	4.88	4.4	0.09	1.87	N	Y	101628
17	al-Wakrah	Qatar	51.61	25.17	4.87	3.05	0.22	4.61	Y	Y	22712
18	as-Sahaniyah	Qatar	51.24	25.4	4.87	3.4	0.14	2.93	Y	Y	7614
19	Fuman	Iran	49.29	37.23	4.87	3.9	0.06	1.3	N	Y	33109
20	Rudsar	Iran	50.3	37.13	4.86	4.23	0.09	1.83	N	Y	39157
21	Umm Salal	Qatar	51.4	25.42	4.85	3.27	0.16	3.25	Y	N	18377
22	Lahijan	Iran	50	37.21	4.83	3.93	0.04	0.78	N	Y	58781
23	Dhahran	Saudi Arabia	50.13	26.3	4.82	4.05	0.11	2.24	Y	Y	94591
24	Bandare Anzli	Iran	49.46	37.47	4.81	4.42	0.05	0.94	N	Y	101734
25	Tehran	Iran	51.42	35.67	4.8	3.8	-0.06	-1.29	N	Y	6994399
26	Khorramshahr	Iran	48.18	30.44	4.77	4.33	0.11	2.24	N	N	116890
27	Dubai	UAE	55.28	25.25	4.76	3.32	0.08	1.67	N	N	880809
28	Adan	Yemen	45.04	12.78	4.75	1.43	0.04	0.85	N	N	540817
29	Astaneh	Iran	49.98	37.27	4.73	3.83	0.03	0.66	N	Y	36487
30	al-Jumayliyah	Qatar	51.09	25.61	4.73	3.31	0.15	3.17	Y	N	2565
31	Sharjah	UAE	55.39	25.36	4.72	3.56	0.06	1.34	N	N	421325
32	Umm al-Qaywayn	UAE	55.55	25.57	4.72	3.6	0.11	2.36	Y	Y	32974
33	Ajman	UAE	55.44	25.41	4.71	3.6	0.06	1.32	N	N	150572
34	Langarud	Iran	50.15	37.2	4.71	3.94	0.07	1.4	N	Y	59858
35	Tuban	Yemen	44.88	13.06	4.71	1.37	0.05	0.99	N	N	25807
36	Abs	Yemen	43.2	16	4.69	1.51	0.11	2.38	Y	Y	24875
37	Mecca	Saudi Arabia	39.84	21.43	4.69	2.54	0.12	2.52	Y	N	1239589
38	Jubayl	Lebanon	35.66	34.13	4.67	3.09	-0.06	-1.35	N	Y	18593
39	Az-Zaydiyah	Yemen	43	15.33	4.66	1.98	0.05	1.03	N	N	18890
40	Sayhat	Saudi Arabia	50.04	26.48	4.66	3.69	0.12	2.55	Y	Y	74527
-	Amol	Iran	52.36	36.47	4.66	4.03	0.04	0.94	N	Y	176301
42	Abadan	Iran	48.3	30.35	4.65	4.32	0.11	2.3	N	N	228027
43	Jaar	Yemen	45.31	13.22	4.63	1.53	0.06	1.19	N	Y	68361
44	Taizz	Yemen	44.04	13.6	4.63	1.37	0.05	1.12	N	Y	431208
45	Attuqbah	Saudi Arabia	50.2	26.27	4.62	4.08	0.1	2.06	N	Y	161287
46	al-Khobar	Saudi Arabia	50.2	26.23	4.62	4.01	0.1	2.14	Y	Y	181867
47	Abu Arish	Saudi Arabia	42.83	16.97	4.61	2.07	0.1	2.18	Y	Y	45116
48	Eslamshahr	Iran	51.26	35.56	4.58	3.9	-0.01	-0.2	N	Y	297516
49	Babol	Iran	52.68	36.54	4.58	3.7	0.07	1.42	N	Y	177434
50	Juniyah	Lebanon	35.62	33.98	4.55	3.27	-0.04	-0.78	N	Y	77472

## Sheet: (f) HCHO-Oil-Refinery
Table 1(f) The 50 highest ranked SAO HCHO median vertical column densities (VCD) found over oil refineries for 2005--2014. Linear trends are deemed significant if |ω/σω | > 2, and real if no statistically significant trends are observed in either the air mass factor, cloud fraction, cloud-top pressure, or number of samples. Percentage linear trends are given relative to the observed median VCD.
						Vertical Column Density [x1015 molecules cm-2]
Rank	Reinfery	Location	Country	Longitude	Latitude	Median	Seasonal	Linear Trend
				[degrees]		VCD	Amplitude	ω	in %	Significant?	Real?	Capacity
1	National Oil Distribution Co	Umm Said	Qatar	51.53	24.95	4.86	3.13	0.15	3.1	Y	N	200000
2	Baniasa Refining Co.	Banias	Syria	35.95	35.13	4.79	3.84	0.09	1.9	N	N	132725
3	National Iranian Oil Co.	Abadan	Iran	48.27	30.35	4.72	4.4	0.11	2.32	Y	N	350000
4	Sharjah Oil Refining Co.	Hamriyah	UAE	55.48	25.45	4.7	3.65	0.07	1.4	N	N	71250
5	Aden Refinery Co.	Little Adeb	Yemen	44.87	12.75	4.65	1.55	0.05	1.06	N	Y	130000
6	National Iranian Oil Co.	Tehran	Iran	51.42	35.53	4.58	3.47	0.01	0.16	N	Y	220000
7	Midland Refineries Co.	Daura	Iraq	44.42	33.27	4.56	3.42	0.06	1.42	N	Y	110000
8	Takreer	Umm Al-Nar	UAE	54.48	24.42	4.56	3.27	0.14	2.98	Y	Y	150000
9	Saudi Aramco Shell Refinery Co.	Al-Jubail	Saudi Arabia	49.57	27.03	4.54	3.19	0.16	3.63	Y	N	290000
10	Oil Refineries Administration	Basra	Iraq	47.82	30.53	4.45	4.07	0.08	1.9	N	Y	150000
11	Takreer	Ruwais	UAE	52.72	24.12	4.45	3.09	0.15	3.47	Y	Y	350000
12	Bahrain Petroleum Co.	Sitra	Bahrain	50.6	26.1	4.42	3.63	0.16	3.55	Y	N	253650
13	Emirates National Oil Co.	Jebel Ali	UAE	55.01	25	4.36	3	0.03	0.64	N	Y	120000
14	Saudi Arabian Oil Co.	Jeddah	Saudi Arabia	39.18	21.42	4.27	2.52	0.06	1.3	N	Y	85000
15	Kuwait National Petroleum Co.	Mina Abdulla	Kuwait	48.15	29	4.24	3.44	0.07	1.7	N	Y	270000
16	Kuwait National Petroleum Co.	Shuaiba	Kuwait	48.13	29.02	4.21	3.28	0.07	1.57	N	Y	200000
-	Kuwait National Petroleum Co.	Mina Al-Ahmadi	Kuwait	48.13	29	4.21	3.28	0.07	1.57	N	Y	466000
18	Oil Refineries Administration	Qaiyarah	Iraq	43.28	35.78	4.2	4.44	0.07	1.62	N	Y	2000
19	Oil Refineries Administration	Mufthia	Iraq	44.12	33.65	4.19	2.98	0	0.02	N	Y	4500
20	Oil Refineries Administration	K3-Haditha	Iraq	44.35	34.07	4.18	2.99	0.07	1.65	N	Y	7000
21	Fujairah Refinery Co.	Fujairah	UAE	56.35	25.18	4.12	2.46	0	0.05	N	N	82000
22	Laffan Refinery Co. Ltd.	Ras Laffan	Qatar	51.57	25.9	4.1	3.39	0.18	4.42	Y	N	138700
23	Oil Refineries Administration	Bajii	Iraq	43.48	35	4.09	4.05	0.04	0.87	N	Y	310000
24	Saudi Arabian Oil Co.	Ras Tanura	Saudi Arabia	50.08	26.7	4	3.15	0.1	2.42	Y	Y	550000
25	Homs Refinery Co.	Homs	Syria	36.63	34.72	3.9	2.76	0	0.11	N	Y	105140
26	National Iranian Oil Co.	Bandar Abbas	Iran	56.07	27.17	3.9	2.46	0.07	1.8	Y	Y	232000
27	National Iranian Oil Co.	Lavan Island	Iran	53.34	26.78	3.84	3.47	0.05	1.36	N	Y	30000
28	Saudi Aramco Mobil	Yanbuh	Saudi Arabia	38.3	23.93	3.82	2.6	0.12	3.05	Y	Y	400000
29	Iraq Co. for Oil Operations	Kirkuk	Iraq	44.33	35.52	3.79	3.92	0.08	2.14	N	Y	2000
30	Saudi Arabian Oil Co.	Yanbuh	Saudi Arabia	38.23	23.96	3.79	2.55	0.13	3.43	Y	Y	235000
31	Saudi Arabian Oil Co.	Rabigh	Saudi Arabia	39	22.72	3.69	2.55	0.11	2.87	Y	N	400000
32	Saudi Arabian Oil Co.	Riydah	Saudi Arabia	46.87	24.52	3.66	3.19	0.07	1.87	N	N	120000
33	National Iranian Oil Co.	Isfahan	Iran	51.5	32.76	3.65	4.43	0.07	1.99	N	Y	284000
34	National Iranian Oil Co.	Tarbiz	Iran	46.15	38.05	3.59	3.99	0.04	1.13	N	N	100000
35	Oman Refinery Co.	Mina ak Fahal	Oman	58.5	23.62	3.44	2.36	0.1	2.92	Y	N	85000
36	Jordan Petroleum Refinery	Zarqa	Jordan	36.1	32.12	3.33	3.21	-0.02	-0.67	N	Y	90400
37	Oil Refineries Lim.	Haifa	Israel	34.51	31.62	3.3	2.71	0.06	1.77	N	Y	130000
38	Oil Refineries Lim.	Ashdod	Israel	34.67	31.83	3.25	2.6	0	-0.1	N	Y	90000
39	National Iranian Oil Co.	Kermanshah	Iran	47.1	34.2	2.9	4.24	0.05	1.75	N	Y	25000
40	National Iranian Oil Co.	Shiraz	Iran	52.65	29.73	2.63	4.54	0.04	1.66	N	Y	40000
41	National Iranian Oil Co.	Arak	Iran	49.47	34	2.54	4.34	0.02	0.92	N	Y	170000

## Sheet: (g) HCHO-Oil-Port
Table 1(g) The 50 highest ranked SAO HCHO median vertical column densities (VCD) found over oil ports for 2005--2014. Linear trends are deemed significant if |ω/σω | > 2, and real if no statistically significant trends are observed in either the air mass factor, cloud fraction, cloud-top pressure, or number of samples. Percentage linear trends are given relative to the observed median VCD.
						Vertical Column Density [x1015 molecules cm-2]
Rank	Port	Location	Country	Longitude	Latitude	Median	Seasonal	Linear Trend
				[degrees]		VCD	Amplitude	ω	in %	Significant?	Real?
1	Bandar-e Khomeni (BIK)	Khuzestan	Iran	49.09	30.42	4.99	4.08	0.11	2.22	Y	Y
2	Sharjah	Sharjah	UAE	55.48	25.47	4.72	3.62	0.07	1.57	N	N
3	Abadan	Khuzestan	Iran	48.28	30.33	4.72	4.4	0.11	2.32	Y	N
4	Umm Al-Narr	Abu Dhabi	UAE	54.5	24.45	4.63	3.49	0.13	2.9	Y	Y
5	Basrah Port	Al-Basrah	Iraq	47.83	30.54	4.45	4.07	0.08	1.9	N	Y
6	Jebel Ali	Dubay	UAE	55.06	25	4.43	3.3	0.04	1.01	N	Y
7	Sitrah	Bahrain	Bahrain	50.67	26.16	4.42	3.45	0.14	3.23	Y	N
8	Al-Ruwais	Abu Dhabi	UAE	52.72	24.16	4.39	3.17	0.15	3.5	Y	Y
9	Zubayr Terminal	Al-Basrah	Iraq	47.91	30.13	4.34	4.15	0.08	1.92	N	Y
10	Umm Qasr	Al-Basrah	Iraq	47.95	30.03	4.3	4.1	0.1	2.27	N	Y
11	Fujairah	Fujayrah	UAE	56.37	25.2	4.12	2.54	0	-0.02	N	Y
12	Mina Al-Ahmadi	Al Ahmadi	Kuwait	48.16	29.05	4.08	3.37	0.07	1.68	N	N
13	Jeddah Terminal	Mecca	Saudi Arabia	39.53	20.67	4.07	2.64	0.07	1.75	N	N
14	Ras Laffan	Al Khawr	Qatar	51.61	25.93	4	3.4	0.16	4.03	Y	Y
15	National Iranian Oil Co.	Kharg Island	Iran	50.3	29.23	3.95	3.87	0.07	1.84	N	Y
16	Dogerdan	Hormozgan	Iran	56.11	27.13	3.83	2.33	0.06	1.55	N	Y
17	Ashqelon Jetty	HaDarom	Israel	34.5	31.63	3.24	2.8	0.06	1.84	N	N
18	Ashdod	HaDarom	Israel	34.64	31.82	3.2	2.53	-0.01	-0.17	N	Y

## Sheet: (h) HCHO-Power-Plant
Table 1(h) The 50 highest ranked SAO HCHO median vertical column densities (VCD) found over power plants for 2005--2014. Linear trends are deemed significant if |ω/σω | > 2, and real if no statistically significant trends are observed in either the air mass factor, cloud fraction, cloud-top pressure, or number of samples. Percentage linear trends are given relative to the observed median VCD.
						Vertical Column Density [x1015 molecules cm-2]
Rank	Reinfery	Location	Country	Longitude	Latitude	Median	Seasonal	Linear Trend				Plant
				[degrees]		VCD	Amplitude	ω	in %	Significant?	Real?	Fuel	Capacity
1	Petroshimi (Bandar Immam)	Khuzestan	Iran	49.1	30.4	5.03	4.03	0.11	2.28	Y	Y	Gas	827MW
2	Al Wajbha GT	Al Wajbha	Qatar	51.4	25.3	4.98	3.25	0.18	3.7	Y	Y	Gas	301MW
3	Doha South Super GT	Doha	Qatar	51.52	25.19	4.97	3.14	0.21	4.3	Y	Y	Gas	67MW
4	Al Saliyah GT	Ar Rayyan	Qatar	51.39	25.21	4.95	3.22	0.18	3.66	Y	Y	Gas	134MW
5	Besat	Tehran	Iran	51.43	35.64	4.94	3.75	-0.05	-1.06	N	Y	Oil	247.5MW
6	Tarasht (Shahid Firouzi)	Tehran	Iran	51.35	35.72	4.89	4.11	-0.11	-2.33	N	Y	Gas	50MW
7	Ras Abu Fontas OCGT Complex	Doha	Qatar	51.62	25.2	4.87	3.05	0.22	4.61	Y	Y	Gas	2178MW
8	Mesaieed CCGT	Mesaieed	Qatar	51.58	24.98	4.86	3.22	0.17	3.57	Y	N	Gas	2007MW
-	Qatalum CCGT	Masaieed	Qatar	51.58	24.97	4.86	3.22	0.17	3.57	Y	N	Gas	1350MW
10	Banias Complex	Tartus	Syria	35.93	35.17	4.75	3.97	0.09	1.97	N	N	Oil	728MW
11	Abadan CCGT	Khuzestan	Iran	48.36	30.4	4.75	4.39	0.11	2.25	N	Y	Gas	811.6MW
12	Gilan CCGT	Gilan	Iran	49.63	37.16	4.72	4.89	0.01	0.18	N	Y	Gas	1305.6MW
13	Mecca OCGT	Mecca	Saudi Arabia	39.8	21.47	4.65	2.58	0.1	2.16	Y	N	Gas	780MW
14	Rey OCGT	Tehran	Iran	51.41	35.52	4.58	3.47	0.01	0.16	N	Y	Gas	1171MW
15	UAN Cogen CCGT Complex	Abu Dhabi City	UAE	54.48	24.44	4.56	3.27	0.14	2.98	Y	Y	Gas	2746MW
16	Zouk	Beirut	Lebanon	35.6	33.97	4.55	3.27	-0.04	-0.78	N	Y	Oil	607MW
17	Deir-Ammar CCGT	Dir-Ammar	Lebanon	35.89	34.47	4.55	3.86	-0.02	-0.43	N	N	Gas	470MW
18	Ameer I II III OCGT Power Station	Dubai	UAE	55.42	25.15	4.46	3.3	0.04	0.91	N	N	Gas	1844MW
19	Ruwais (Takreer) Cogen GT	Abu Dhabi City	UAE	52.73	24.13	4.45	3.09	0.15	3.47	Y	Y	Gas	700MW
20	Al-Hreesha (Hreishi)	Al Hraiche	Lebanon	35.76	34.38	4.44	4	-0.03	-0.67	N	N	Oil	75MW
21	Khor Al Zubayr OCGT	Basra	Iraq	47.82	30.21	4.43	4.07	0.11	2.38	N	Y	Gas	252MW
22	Dubai Aluminium CCGT	Dubai City	UAE	55.09	25.03	4.43	3.3	0.04	1.01	N	Y	Gas	2000MW
23	Marafiq Jubail IWPP	Jubail Industrial Area	Saudi Arabia	49.61	27.07	4.43	3.29	0.17	3.79	Y	N	Gas	2745MW
24	Multiple Plants	Bahrain Area	Bahrain	50.6	26.1	4.42	3.63	0.16	3.55	Y	N	Both	5989MW
25	Mirfa GT	Al Mirfa	UAE	53.45	24.12	4.41	3.04	0.07	1.68	N	N	Gas	192MW
26	Qurayyah	Eastern Province	Saudi Arabia	50.12	25.86	4.39	3.86	0.15	3.31	Y	N	Oil	2500MW
27	Shuweihat I Cogen CCGT	Jebel Dhana	UAE	52.57	24.17	4.36	3.19	0.13	2.95	Y	Y	Gas	1615MW
28	Gazlan I and II	Ras Tanura	Saudi Arabia	49.9	26.85	4.31	2.61	0.13	3.08	Y	Y	Gas	4528MW
29	Taweelah Cogen CCGT Complex	Abu Dhabi City	UAE	54.68	24.76	4.3	3.31	0.1	2.4	Y	Y	Gas	4696MW
30	Qurayyah ll CCGT	Ash Sharqiyah	Saudi Arabia	50.13	25.83	4.29	3.83	0.15	3.46	Y	N	Gas	3777MW
31	Jeddah PP2 and PP3C OCGT Complex	Jeddah	Saudi Arabia	39.19	21.44	4.27	2.52	0.06	1.3	N	Y	Gas	611MW
32	Abu Dhabi	Abu Dhabi City	UAE	54.38	24.51	4.26	2.93	0.13	3.02	Y	Y	Gas	518MW
33	Shuiba North CCGT and South (SSPS)	Shuiba	Kuwait	48.15	29.04	4.22	3.23	0.07	1.76	N	Y	Gas	1680MW
34	Aleppo	Jibrin	Syria	37.44	36.18	4.22	4.05	0.04	0.9	N	Y	Oil	1065MW
-	Aleppo OCGT	Jibrin	Syria	37.44	36.17	4.22	4.05	0.04	0.9	N	Y	Gas	30MW
36	Tihama Shedqum Cogeneration GT	Ash Sharqiyah	Saudi Arabia	49.39	25.65	4.21	3.38	0.09	2.23	Y	Y	Gas	305MW
37	Zargan	Khuzestan	Iran	48.77	31.37	4.2	4.83	0.02	0.52	N	Y	Gas	418MW
38	Mehardeh	Hama	Syria	36.58	35.26	4.19	3.43	0.05	1.14	N	Y	Oil	630MW
39	Mobin Petroshimi OCGT CHP	Bushehr	Iran	52.55	27.55	4.16	4.54	0.21	5.12	Y	Y	Gas	738MW
40	Fujairah (Qidfa) 1 Cogen CCGT	Qidfa	UAE	56.37	25.31	4.16	2.65	0.01	0.27	N	Y	Gas	881MW
41	Jieh	Sidon	Lebanon	35.4	33.65	4.13	2.89	0.04	1.08	N	Y	Oil	346MW
42	Montazare Ghaem CCGT	Karaj	Iran	51.01	35.73	4.11	4.28	-0.04	-1.06	N	Y	Gas	997.5MW
43	Shaiba	Mecca	Saudi Arabia	39.56	20.63	4.11	2.52	0.09	2.19	Y	N	Oil	5523MW
44	Az Zour South	Mina Said (Al Ahmadi)	Kuwait	48.37	28.7	4.11	3.1	0.07	1.76	N	Y	Gas	2536MW
-	Az Zour South (ZSPS)	Mina Said (Al Ahmadi)	Kuwait	48.37	28.71	4.11	3.1	0.07	1.76	N	Y	Oil	2400MW
46	Tihama Ras Tanura Cogeneration GT	Ras Tanura	Saudi Arabia	50	26.8	4.11	2.96	0.1	2.46	Y	Y	Gas	148MW
47	Ras Laffan B CCGT Complex	Ras Laffan	Qatar	51.55	25.92	4.09	3.33	0.18	4.38	Y	N	Gas	4511MW
48	Ahwaz (Ramin)	Kuzestan	Iran	48.88	31.5	4.09	4.63	0.04	0.97	N	Y	Oil	1890MW
49	Zahrani CCGT	Jall Aairam	Lebanon	35.34	33.5	4.08	2.77	0.02	0.46	N	Y	Gas	470MW
50	Asalooyeh OCGT	Bushehr	Iran	52.66	27.49	4.07	4.24	0.16	3.82	Y	Y	Gas	954MW

## Sheet: (i) SO2-Urban
Table 1(i) The 50 highest ranked NASA SO2 median vertical column densities (VCD) found over urban locations for 2005--2014. Linear trends are deemed significant if |ω/σω | > 2, and real if no statistically significant trends are observed in either the cloud fraction, cloud-top pressure, or number of samples. Percentage linear trends are given relative to the observed median VCD.
					Vertical Column Density [Dobson Units]
Rank	Settlement	Country	Longitude	Latitude	Median	Seasonal	Linear Trend
			[degrees]		VCD	Amplitude	ω	in %	Significant?	Real?	Population
1	Rafsanjan	Iran	55.99	30.41	0.73	0.93	0.03	3.71	N	N	115905
2	Funtas	Kuwait	48.12	29.17	0.68	0.51	0	-0.32	N	Y	17067
3	Subahiya	Kuwait	48.11	29.12	0.68	0.49	0	-0.37	N	Y	66514
-	Reqa	Kuwait	48.11	29.15	0.68	0.49	0	-0.37	N	Y	38519
-	Mahboola	Kuwait	48.12	29.15	0.68	0.49	0	-0.37	N	Y	13447
-	Abu Halifa	Kuwait	48.12	29.14	0.68	0.49	0	-0.37	N	Y	21433
7	Mangaf	Kuwait	48.13	29.1	0.67	0.5	0	-0.18	N	Y	28869
-	Fahaheel	Kuwait	48.13	29.08	0.67	0.5	0	-0.18	N	Y	50520
9	Subbah Al-Salem	Kuwait	48.06	29.26	0.66	0.53	0	0.14	N	Y	71602
-	Salwa	Kuwait	48.08	29.3	0.66	0.53	0	0.14	N	Y	47528
11	Jabber-Al-Ali	Kuwait	48.08	29.17	0.66	0.49	0	-0.24	N	Y	28134
12	Salmiya	Kuwait	48.08	29.33	0.66	0.52	0	0.26	N	Y	171391
-	Rimaithiya	Kuwait	48.07	29.31	0.66	0.52	0	0.26	N	Y	37239
14	al-Ahmadi	Kuwait	48.08	29.07	0.65	0.52	0	-0.05	N	Y	28303
15	Jabriya	Kuwait	48.02	29.32	0.65	0.5	0	0.59	N	Y	39978
-	Hawalli	Kuwait	48.03	29.33	0.65	0.5	0	0.59	N	Y	108242
-	Bayan	Kuwait	48.04	29.32	0.65	0.5	0	0.59	N	Y	35561
18	Bushehr	Iran	50.84	28.98	0.65	0.57	-0.04	-6.27	Y	N	152926
19	Abrak Kheetan	Kuwait	47.97	29.29	0.64	0.49	0	-0.32	N	Y	38437
20	Rawda	Kuwait	47.98	29.34	0.63	0.47	0	0.63	N	Y	19006
-	al-Kuwayt	Kuwait	47.98	29.33	0.63	0.47	0	0.63	N	Y	37837
-	Keefan	Kuwait	47.96	29.34	0.63	0.47	0	0.63	N	Y	17205
-	Faiha	Kuwait	47.97	29.34	0.63	0.47	0	0.63	N	Y	12523
24	Jeddah	Saudi Arabia	39.22	21.52	0.63	0.88	-0.02	-2.81	N	N	2626611
25	Jaleeb Al-Shuyukh	Kuwait	47.94	29.27	0.61	0.53	0	-0.47	N	Y	134488
-	Farwaniya	Kuwait	47.91	29.27	0.61	0.53	0	-0.47	N	Y	69891
27	Rabia	Kuwait	47.9	29.29	0.58	0.54	0	-0.21	N	Y	29439
-	Ardiya	Kuwait	47.88	29.29	0.58	0.54	0	-0.21	N	Y	44485
29	Sulaibkhat	Kuwait	47.87	29.32	0.56	0.51	0	0.11	N	Y	20555
30	Omidiyeh	Iran	49.19	31.29	0.56	0.42	-0.01	-1.94	N	Y	52318
31	Musayid	Qatar	51.55	25	0.53	0.67	-0.01	-1.6	N	N	7835
32	Khomeynishahr	Iran	51.53	32.69	0.48	0.93	0.03	6.15	N	Y	183561
33	Kirkuk	Iraq	44.39	35.47	0.47	0.33	0.02	3.33	N	N	600646
34	Rahnan	Iran	51.6	32.69	0.47	1	0.03	6.16	N	Y	45037
35	Bandare Gonaveh	Iran	50.52	29.57	0.47	0.42	-0.02	-3.29	N	N	51611
36	Rabigh	Saudi Arabia	39.02	22.8	0.46	0.58	0.03	6.09	N	N	41028
37	Mecca	Saudi Arabia	39.84	21.43	0.44	0.64	0	-0.99	N	N	1239589
38	al-Wakrah	Qatar	51.61	25.17	0.44	0.56	-0.01	-2.91	N	Y	22712
39	Darchehpiaz	Iran	51.55	32.62	0.43	0.8	0.03	6.34	N	Y	35047
40	Shahreza	Iran	51.81	32.9	0.42	1.15	0.02	4.59	N	Y	94091
41	Golara	Iran	51.44	32.63	0.42	0.73	0.03	6.24	N	Y	58983
42	Bandar Abbas	Iran	56.25	27.25	0.42	0.48	0.02	4.59	N	Y	294499
43	Sirjan	Iran	55.67	29.45	0.42	0.73	0.01	1.38	N	Y	161571
44	Bandar Khomeyni	Iran	49.11	30.44	0.42	0.32	-0.02	-5.78	Y	Y	55101
45	Rahimah	Saudi Arabia	50.06	26.71	0.41	0.44	0	-0.17	N	Y	58367
46	al-Jubayl	Saudi Arabia	49.66	27	0.41	0.49	0	-0.18	N	Y	180769
47	Esfahan	Iran	51.68	32.68	0.41	1.11	0.03	6.77	N	Y	1389558
48	Safwah	Saudi Arabia	49.96	26.65	0.4	0.45	0	-1.23	N	Y	47864
49	ar-Rifa	Bahrain	50.56	26.13	0.4	0.55	-0.01	-2.98	N	Y	76276
50	Isa	Bahrain	50.55	26.17	0.4	0.54	-0.01	-2.88	N	Y	36594

## Sheet: (j) SO2-Oil-Refinery
Table 1(j) The 50 highest ranked NASA SO2 median vertical column densities (VCD) found over oil refineries for 2005--2014. Linear trends are deemed significant if |ω/σω | > 2, and real if no statistically significant trends are observed in either the cloud fraction, cloud-top pressure, or number of samples. Percentage linear trends are given relative to the observed median VCD.
						Vertical Column Density [Dobson Units]
Rank	Reinfery	Location	Country	Longitude	Latitude	Median	Seasonal	Linear Trend
				[degrees]		VCD	Amplitude	ω	in %	Significant?	Real?	Capacity
1	Kuwait National Petroleum Co.	Shuaiba	Kuwait	48.13	29.02	0.69	0.54	-0.01	-0.92	N	Y	200000
-	Kuwait National Petroleum Co.	Mina Al-Ahmadi	Kuwait	48.13	29	0.69	0.54	-0.01	-0.92	N	Y	466000
3	Kuwait National Petroleum Co.	Mina Abdulla	Kuwait	48.15	29	0.68	0.53	0	-0.73	N	Y	270000
4	National Iranian Oil Co.	Isfahan	Iran	51.5	32.76	0.61	1.13	0.03	5.11	N	Y	284000
5	Saudi Arabian Oil Co.	Jeddah	Saudi Arabia	39.18	21.42	0.58	0.8	-0.02	-2.74	N	Y	85000
6	National Oil Distribution Co	Umm Said	Qatar	51.53	24.95	0.52	0.67	-0.01	-1.33	N	N	200000
7	Iraq Co. for Oil Operations	Kirkuk	Iraq	44.33	35.52	0.48	0.31	0.02	3.51	N	N	2000
8	National Iranian Oil Co.	Lavan Island	Iran	53.34	26.78	0.46	0.67	-0.01	-1.46	N	Y	30000
9	Midland Refineries Co.	Daura	Iraq	44.42	33.27	0.46	0.36	0.04	9.13	Y	Y	110000
10	National Iranian Oil Co.	Bandar Abbas	Iran	56.07	27.17	0.44	0.54	0.03	5.89	N	Y	232000
11	Saudi Arabian Oil Co.	Rabigh	Saudi Arabia	39	22.72	0.43	0.58	0.03	5.82	N	N	400000
12	Saudi Arabian Oil Co.	Ras Tanura	Saudi Arabia	50.08	26.7	0.41	0.44	0	-0.17	N	Y	550000
13	Laffan Refinery Co. Ltd.	Ras Laffan	Qatar	51.57	25.9	0.41	0.7	0	-0.63	N	Y	138700
14	Bahrain Petroleum Co.	Sitra	Bahrain	50.6	26.1	0.4	0.51	-0.01	-2.19	N	Y	253650
15	Saudi Aramco Shell Refinery Co.	Al-Jubail	Saudi Arabia	49.57	27.03	0.39	0.48	0	0.38	N	N	290000
16	Emirates National Oil Co.	Jebel Ali	UAE	55.01	25	0.33	0.49	-0.01	-2.64	N	Y	120000
17	Sharjah Oil Refining Co.	Hamriyah	UAE	55.48	25.45	0.33	0.47	-0.02	-4.75	N	Y	71250
18	National Iranian Oil Co.	Arak	Iran	49.47	34	0.3	0.47	0.03	9.37	Y	Y	170000
19	Saudi Arabian Oil Co.	Riydah	Saudi Arabia	46.87	24.52	0.29	0.57	-0.01	-2.08	N	N	120000
20	Saudi Aramco Mobil	Yanbuh	Saudi Arabia	38.3	23.93	0.29	0.45	0	0.97	N	Y	400000
21	Saudi Arabian Oil Co.	Yanbuh	Saudi Arabia	38.23	23.96	0.28	0.45	0	0.82	N	Y	235000
22	National Iranian Oil Co.	Tehran	Iran	51.42	35.53	0.28	0.65	0.01	3.96	N	Y	220000
23	Oil Refineries Administration	Bajii	Iraq	43.48	35	0.22	0.34	0	1.85	N	Y	310000
24	National Iranian Oil Co.	Abadan	Iran	48.27	30.35	0.22	0.3	0.02	8.35	N	N	350000
25	Baniasa Refining Co.	Banias	Syria	35.95	35.13	0.21	0.28	0	-1.76	N	N	132725
26	Fujairah Refinery Co.	Fujairah	UAE	56.35	25.18	0.21	0.24	0	1.27	N	Y	82000
27	Homs Refinery Co.	Homs	Syria	36.63	34.72	0.21	0.26	-0.01	-5.58	N	Y	105140
28	Takreer	Umm Al-Nar	UAE	54.48	24.42	0.2	0.38	-0.01	-5.14	N	Y	150000
29	Oil Refineries Administration	Basra	Iraq	47.82	30.53	0.2	0.35	0.02	8.53	N	Y	150000
30	Takreer	Ruwais	UAE	52.72	24.12	0.18	0.38	0	-1.42	N	N	350000
31	Oil Refineries Lim.	Haifa	Israel	34.51	31.62	0.13	0.18	0	1.3	N	N	130000
32	Oil Refineries Administration	Mufthia	Iraq	44.12	33.65	0.13	0.34	0.02	14.88	Y	Y	4500
33	Oman Refinery Co.	Mina ak Fahal	Oman	58.5	23.62	0.11	0.16	0	0.57	N	Y	85000
34	Jordan Petroleum Refinery	Zarqa	Jordan	36.1	32.12	0.11	0.25	0	-1.7	N	N	90400
35	Oil Refineries Administration	K3-Haditha	Iraq	44.35	34.07	0.1	0.31	0.01	12.79	N	Y	7000
36	Oil Refineries Lim.	Ashdod	Israel	34.67	31.83	0.09	0.18	-0.01	-9.09	N	N	90000
37	National Iranian Oil Co.	Shiraz	Iran	52.65	29.73	0.09	0.2	0	-2.61	N	Y	40000
38	National Iranian Oil Co.	Kermanshah	Iran	47.1	34.2	0.08	0.22	0	4.14	N	N	25000
39	Aden Refinery Co.	Little Adeb	Yemen	44.87	12.75	0.07	0.17	0	-1.57	N	Y	130000
40	National Iranian Oil Co.	Tarbiz	Iran	46.15	38.05	0.03	0.68	0.03	76.53	N	N	100000
41	Oil Refineries Administration	Qaiyarah	Iraq	43.28	35.78	0.02	0.27	0.02	70.66	N	N	2000

[truncated: 6 more sheets: (k) SO2-Oil-Port, (l) SO2-Power-Plant, (m) CHOCHO-Urban, (n) CHOCHO-Oil-Refinery, (o) CHOCHO-Oil-Port, (p) CHOCHO-Power-Plant]
