# Supplementary material for: OMI air-quality monitoring over the Middle East
Source: Copernicus journal article supplement (doi:10.5194/acp-2016-784), 2016-10-04
Supplement: Supplementary file 3 [file TABLE-S2-RANKED-POLLUTION-TRENDS.xlsx]

## Sheet: (a) NO2-Urban
Table 2(a) The top 50 highest ranked statistically significant and real linear trends in DOMINO NO2 median vertical column densities (VCD) found over urban locations for 2005--2014. Linear trends are deemed significant if |ω/σω | > 2, and real if no statistically significant trends are observed in either the air mass factor, cloud fraction, cloud-top pressure, or number of samples. The correspond…
					Vertical Column Density [x1014 molecules cm-2]
Rank	Settlement	Country	Longitutde	Latitude	Linear Trend		Growth Rate		Population
			[Degrees]		ω	in %	G	in %
1	Dahuk	Iraq	43	36.87	2.77+/-0.35	12.23+/-1.54	2.82+/-1.85	12.44+/-8.18	65683
2	Irbil	Iraq	44.01	36.19	2.55+/-0.34	8.76+/-1.17	2.20+/-2.00	7.55+/-6.86	697271
3	al-Hillah	Iraq	44.43	32.48	2.45+/-0.21	9.91+/-0.84	2.56+/-1.05	10.37+/-4.24	385725
4	az-Zubayr	Iraq	47.71	30.39	2.18+/-0.28	7.45+/-0.94	1.51+/-1.54	5.18+/-5.27	160689
5	Shahriyar	Iran	51.06	35.66	1.90+/-0.63	3.75+/-1.23	0.71+/-3.74	1.39+/-7.36	47489
6	Baghdad	Iraq	44.39	33.34	1.90+/-0.27	5.18+/-0.73	1.08+/-1.42	2.93+/-3.88	5511490
7	ad-Diwaniyah	Iraq	44.93	31.99	1.85+/-0.22	7.86+/-0.92	1.27+/-1.08	5.42+/-4.60	281967
8	Tehran	Iran	51.42	35.67	1.75+/-0.72	3.26+/-1.34	2.04+/-4.11	3.81+/-7.67	6994399
9	Nazarabad	Iran	50.6	35.95	1.61+/-0.35	5.28+/-1.15	2.43+/-2.10	7.96+/-6.90	76683
10	Beirut	Lebanon	35.51	33.87	1.58+/-0.41	4.92+/-1.29	1.53+/-2.58	4.77+/-8.03	1136268
11	Juniyah	Lebanon	35.62	33.98	1.56+/-0.41	4.59+/-1.20	1.27+/-2.48	3.73+/-7.30	77472
-	Rahnan	Iran	51.6	32.69	1.56+/-0.50	4.05+/-1.29	1.15+/-3.25	2.98+/-8.42	45037
13	Karaj	Iran	50.97	35.8	1.55+/-0.58	3.27+/-1.23	0.35+/-3.59	0.75+/-7.60	1041217
14	Babda	Lebanon	35.53	33.83	1.52+/-0.40	4.67+/-1.24	2.13+/-2.54	6.57+/-7.81	56813
15	Kirkuk	Iraq	44.39	35.47	1.51+/-0.26	5.54+/-0.97	0.65+/-1.44	2.39+/-5.27	600646
16	Darchehpiaz	Iran	51.55	32.62	1.48+/-0.52	4.07+/-1.44	0.92+/-3.23	2.53+/-8.88	35047
17	al-Kufah	Iraq	44.39	32.03	1.46+/-0.17	7.42+/-0.89	1.07+/-0.95	5.43+/-4.83	119246
18	al-Jubayl	Saudi Arabia	49.66	27	1.43+/-0.30	3.97+/-0.82	1.34+/-1.90	3.70+/-5.25	180769
19	Alayh	Lebanon	35.6	33.81	1.42+/-0.42	4.14+/-1.22	1.47+/-2.65	4.31+/-7.75	25927
20	Khomeynishahr	Iran	51.53	32.69	1.38+/-0.54	3.63+/-1.42	0.35+/-3.40	0.92+/-8.95	183561
21	Esfahan	Iran	51.68	32.68	1.33+/-0.50	3.22+/-1.20	0.52+/-3.08	1.25+/-7.47	1389558
22	an-Najaf	Iraq	44.33	31.98	1.32+/-0.17	7.15+/-0.93	1.02+/-0.96	5.53+/-5.20	443370
23	Attuqbah	Saudi Arabia	50.2	26.27	1.30+/-0.43	2.67+/-0.88	1.82+/-2.63	3.75+/-5.41	161287
24	Mehrshahr	Iran	50.88	35.84	1.26+/-0.47	3.15+/-1.16	1.30+/-2.89	3.23+/-7.20	254839
25	Dhahran	Saudi Arabia	50.13	26.3	1.25+/-0.43	2.55+/-0.88	1.25+/-2.59	2.56+/-5.29	94591
26	Ridyah	Saudi Arabia	46.77	24.64	1.25+/-0.32	3.27+/-0.85	0.88+/-1.96	2.30+/-5.15	3563456
27	al-Amarah	Iraq	47.17	31.85	1.23+/-0.17	6.89+/-0.98	1.27+/-1.01	7.07+/-5.64	299584
28	Khoraskan	Iran	51.75	32.65	1.21+/-0.45	3.07+/-1.15	1.88+/-2.85	4.77+/-7.23	66005
29	Malard	Iran	50.98	35.67	1.21+/-0.54	2.99+/-1.35	0.10+/-3.37	0.25+/-8.36	97505
30	Jazin	Lebanon	35.61	33.59	1.20+/-0.30	4.11+/-1.02	1.21+/-1.83	4.15+/-6.26	11982
31	Yazd	Iran	54.37	31.9	1.18+/-0.17	6.13+/-0.88	1.22+/-1.03	6.33+/-5.36	374810
32	Robat Karim	Iran	51.08	35.48	1.17+/-0.39	3.66+/-1.23	0.59+/-2.29	1.85+/-7.20	40388
33	Golara	Iran	51.44	32.63	1.16+/-0.53	3.33+/-1.51	0.18+/-3.23	0.52+/-9.25	58983
34	Doha	Qatar	51.53	25.29	1.16+/-0.34	3.08+/-0.90	0.73+/-2.00	1.93+/-5.32	278409
35	Falavarjan	Iran	51.49	32.57	1.12+/-0.51	3.11+/-1.40	0.40+/-3.17	1.10+/-8.76	42269
36	Hashtgerd	Iran	50.66	35.97	1.12+/-0.33	3.36+/-0.98	1.30+/-2.02	3.92+/-6.10	37179
37	an-Nasiriyah	Iraq	46.27	31.03	1.08+/-0.17	5.30+/-0.83	1.20+/-1.00	5.91+/-4.93	381569
38	al-Kut	Iraq	45.83	32.5	1.07+/-0.22	5.50+/-1.11	0.80+/-1.25	4.11+/-6.42	262832
39	Sulaibkhat	Kuwait	47.87	29.32	1.05+/-0.35	2.82+/-0.95	0.90+/-2.07	2.42+/-5.57	20555
40	Abyek	Iran	50.53	36.05	1.03+/-0.33	3.25+/-1.04	1.23+/-1.92	3.87+/-6.05	39955
41	Addammam	Saudi Arabia	50.11	26.43	0.99+/-0.44	2.04+/-0.90	1.02+/-2.51	2.09+/-5.16	619117
42	Bandar Khomeyni	Iran	49.11	30.44	0.96+/-0.20	3.57+/-0.75	0.82+/-1.30	3.04+/-4.81	55101
43	as-Satrah	Iraq	46.17	31.41	0.95+/-0.20	5.62+/-1.17	1.09+/-1.12	6.45+/-6.61	73893
44	Rabia	Kuwait	47.9	29.29	0.95+/-0.38	2.32+/-0.92	0.80+/-2.16	1.95+/-5.30	29439
-	Ardiya	Kuwait	47.88	29.29	0.95+/-0.38	2.32+/-0.92	0.80+/-2.16	1.95+/-5.30	44485
46	Ar Rayyan	Qatar	51.42	25.29	0.94+/-0.29	2.77+/-0.85	0.83+/-1.78	2.44+/-5.23	176850
47	Ahvaz	Iran	48.69	31.33	0.94+/-0.24	3.15+/-0.79	0.91+/-1.46	3.05+/-4.87	875607
48	Someh Sara	Iran	49.32	37.28	0.93+/-0.33	4.61+/-1.64	1.12+/-1.99	5.57+/-9.88	33596
49	al-Hawr	Qatar	51.51	25.69	0.93+/-0.27	3.43+/-1.02	1.50+/-1.60	5.55+/-5.94	2736
50	Bonab	Iran	46.05	37.33	0.90+/-0.19	5.50+/-1.16	1.05+/-1.14	6.42+/-6.97	68675
------------------------------------------------------------------------------------------------------------------------------------------------------------------------------------------------------------------------------------------

## Sheet: (b) NO2-Oil-Refinery
Table 2(b) The top ranked statistically significant and real linear trends in DOMINO NO2 median vertical column densities (VCD) found over oil refineries for 2005--2014. Linear trends are deemed significant if |ω/σω | > 2, and real if no statistically significant trends are observed in either the air mass factor, cloud fraction, cloud-top pressure, or number of samples. The corresponding median g…
						Vertical Column Density [x1014 molecules cm-2]
Rank	Refinery	Location	Country	Lognitude	Latitude	Linear Trend		Growth Rate		Capacity
				[Degrees]		ω	in %	G	in %	[b/cd]
1	Midland Refineries Co.	Daura	Iraq	44.42	33.27	2.65+/-0.40	5.66+/-0.84	1.74+/-2.28	3.71+/-4.86	40000
2	National Iranian Oil Co.	Tehran	Iran	51.42	35.53	1.57+/-0.54	3.43+/-1.17	1.64+/-3.01	3.59+/-6.56	25000
3	Iraq Co. for Oil Operations	Kirkuk	Iraq	44.33	35.52	1.57+/-0.27	5.88+/-1.01	0.97+/-1.46	3.62+/-5.45	30000
4	National Iranian Oil Co.	Isfahan	Iran	51.5	32.76	1.35+/-0.49	3.72+/-1.35	0.87+/-2.99	2.41+/-8.23	350000
5	Saudi Aramco Shell Refinery Co.	Al-Jubail	Saudi Arabia	49.57	27.03	1.30+/-0.25	3.78+/-0.74	1.48+/-1.63	4.28+/-4.71	150000
6	Saudi Arabian Oil Co.	Riydah	Saudi Arabia	46.87	24.52	1.13+/-0.45	3.25+/-1.30	0.83+/-2.78	2.38+/-7.97	310000
7	Takreer	Ruwais	UAE	52.72	24.12	1.03+/-0.16	5.28+/-0.83	1.25+/-0.92	6.40+/-4.67	7000
8	Emirates National Oil Co.	Jebel Ali (Dubai)	UAE	55.01	25	0.90+/-0.37	2.41+/-1.00	1.48+/-2.16	3.97+/-5.81	2000
9	Oil Refineries Administration	Mufthia	Iraq	44.12	33.65	0.84+/-0.18	4.13+/-0.91	0.63+/-1.07	3.13+/-5.30	220000
10	National Iranian Oil Co.	Arak	Iran	49.47	34	0.78+/-0.33	4.21+/-1.77	0.19+/-2.05	1.03+/-11.07	253650
11	Oil Refineries Administration	Bajii	Iraq	43.48	35	0.69+/-0.21	3.46+/-1.07	0.65+/-1.15	3.27+/-5.73	100000
12	Takreer	Umm Al-Nar	UAE	54.48	24.42	0.67+/-0.31	2.09+/-0.97	0.70+/-1.83	2.18+/-5.74	4500
13	National Iranian Oil Co.	Lavan Island	Iran	53.34	26.78	0.64+/-0.15	3.67+/-0.84	0.85+/-0.84	4.89+/-4.84	232000
14	Jordan Petroleum Refinery	Zarqa	Jordan	36.1	32.12	0.63+/-0.20	2.01+/-0.64	0.67+/-1.26	2.13+/-4.03	2000
15	National Iranian Oil Co.	Tarbiz	Iran	46.15	38.05	0.60+/-0.29	2.62+/-1.28	0.31+/-1.59	1.35+/-7.01	284000
16	Oman reinfery Co.	Mina ak Fahal	Oman	58.5	23.62	0.58+/-0.16	2.87+/-0.79	0.65+/-0.90	3.21+/-4.45	110000
17	National Iranian Oil Co.	Kermanshah	Iran	47.1	34.2	0.57+/-0.16	4.26+/-1.18	0.68+/-0.86	5.11+/-6.41	170000

## Sheet: (c) NO2-Oil-Port
Table 2(c) The top ranked statistically significant and real linear trends in DOMINO NO2 median vertical column densities (VCD) found over oil ports for 2005--2014. Linear trends are deemed significant if |ω/σω | > 2, and real if no statistically significant trends are observed in either the air mass factor, cloud fraction, cloud-top pressure, or number of samples. The corresponding median growth…
						Vertical Column Density [x1014 molecules cm-2]
Rank	Port	Location	Country	Lognitude	Latitude	Linear Trend		Growth Rate
				[Degrees]		ω	in %	G	in %
1	Umm Qasr	Al-Basrah	Iraq	47.95	30.03	3.12+/-0.29	9.37+/-0.87	3.44+/-1.69	10.32+/-5.08
2	Zubayr Terminal	Al-Basrah	Iraq	47.91	30.13	3.03+/-0.28	8.86+/-0.83	3.29+/-1.70	9.61+/-4.97
3	Jebel Ali	Dubai	UAE	55.06	25	1.11+/-0.43	2.74+/-1.08	1.07+/-2.42	2.66+/-6.00
4	Al-Ruwais	Abu Dhabi	UAE	52.72	24.16	0.99+/-0.16	5.15+/-0.84	0.51+/-0.90	2.66+/-4.67
5	Bandar-e Khomeni (BIK)	Khuzestan	Iran	49.09	30.42	0.95+/-0.19	3.67+/-0.75	0.82+/-1.23	3.15+/-4.73
6	Umm Al-Narr	Abu Dhabi	UAE	54.5	24.45	0.74+/-0.32	2.26+/-0.98	0.83+/-1.89	2.55+/-5.80

## Sheet: (d) NO2-Power-Plant
Table 2(c) The top 50 ranked statistically significant and real linear trends in DOMINO NO2 median vertical column densities (VCD) found over power plants for 2005--2014. Linear trends are deemed significant if |ω/σω | > 2, and real if no statistically significant trends are observed in either the air mass factor, cloud fraction, cloud-top pressure, or number of samples. The corresponding median …
						Vertical Column Density [x1014 molecules cm-2]
Rank	Power Plant	Location	Country	Lognitude	Latitude	Linear Trend		Growth Rate		Plant
				[Degrees]		ω	in %	G	in %	Fuel	Capacity
1	Sabiya CCGT and OCGT	Subiyah	Kuwait	48.18	29.56	2.65+/-0.34	8.13+/-1.04	2.33+/-2.14	7.17+/-6.57	Gas	1820MW
-	Sabiya I Thermal	Qasr as Sabiyah	Kuwait	48.17	29.57	2.65+/-0.34	8.13+/-1.04	2.33+/-2.14	7.17+/-6.57	Oil	2400MW
3	Khor Al Zubayr OCGT	Basra	Iraq	47.82	30.21	2.62+/-0.27	8.18+/-0.85	2.95+/-1.53	9.22+/-4.78	Gas	252MW
4	Besat Thermal	Tehran	Iran	51.43	35.64	2.29+/-0.93	3.76+/-1.53	1.98+/-5.28	3.25+/-8.67	Oil	247.5MW
5	Montazare Ghaem CCGT	Karaj	Iran	51.01	35.73	1.78+/-0.62	3.55+/-1.24	-0.33+/-3.74	-0.66+/-7.48	Gas	997.5MW
6	Mobin Petroshimi OCGT CHP	Bushehr	Iran	52.55	27.55	1.73+/-0.29	5.88+/-0.99	2.03+/-1.63	6.91+/-5.53	Gas	738MW
7	Rey OCGT	Tehran	Iran	51.41	35.52	1.57+/-0.54	3.43+/-1.17	1.64+/-3.01	3.59+/-6.56	Gas	1171MW
8	Zouk Thermal	Beirut	Lebanon	35.6	33.97	1.56+/-0.41	4.59+/-1.20	1.27+/-2.48	3.73+/-7.30	Oil	607MW
9	Marafiq Jubail IWPP	Jubail Industrial Area	Saudi Arabia	49.61	27.07	1.38+/-0.27	4.23+/-0.84	1.14+/-1.80	3.48+/-5.52	Gas	2745MW
10	Shahid Mohammed Montazeri Thermal	Esfahan	Iran	51.49	32.8	1.35+/-0.49	3.72+/-1.35	0.87+/-2.99	2.41+/-8.23	Oil	1600MW
11	Shahid Montazare Ghaem Thermal	Karaj	Iran	51	35.73	1.35+/-0.56	3.07+/-1.28	0.55+/-3.38	1.26+/-7.72	Oil	625.88MW
12	Riyadh PP4 Oil GT	Riyadh	Saudi Arabia	46.67	24.65	1.29+/-0.38	2.82+/-0.83	1.17+/-2.28	2.54+/-4.97	Gas	65MW
13	Riyadh PP9 A B CCGT	Riyadh	Saudi Arabia	47.06	24.95	1.12+/-0.25	4.03+/-0.90	0.74+/-1.40	2.68+/-5.06	Gas	1360MW
14	Dubai Aluminium CCGT	Dubai City	UAE	55.09	25.03	1.11+/-0.43	2.74+/-1.08	1.07+/-2.42	2.66+/-6.00	Gas	2000MW
15	Parand	Tehran	Iran	51.01	35.46	1.05+/-0.40	3.51+/-1.34	0.62+/-2.30	2.06+/-7.71	Gas	960MW
16	Fars CCGT	Fars	Iran	52.62	29.36	1.04+/-0.23	4.69+/-1.03	1.19+/-1.44	5.37+/-6.48	Gas	1035MW
17	Ruwais (Takreer) Cogen GT	Abu Dhabi City	UAE	52.73	24.13	1.03+/-0.16	5.28+/-0.83	1.25+/-0.92	6.40+/-4.67	Gas	700MW
18	Shuweihat I Cogen CCGT	Jebel Dhana	UAE	52.57	24.17	1.03+/-0.16	5.35+/-0.85	0.67+/-0.94	3.51+/-4.93	Gas	1615MW
19	Hussein Thermal	Al Zarqa	Jordan	36.12	32.12	1.02+/-0.28	3.30+/-0.91	1.39+/-1.61	4.53+/-5.24	Oil	382MW
-	Samra CCGT Jordan	Al Zarqa	Jordan	36.14	32.14	1.02+/-0.28	3.30+/-0.91	1.39+/-1.61	4.53+/-5.24	Gas	1031MW
21	South Esfahan CCGT	Esfahan	Iran	51.53	32.26	0.98+/-0.23	3.97+/-0.92	0.77+/-1.36	3.11+/-5.48	Gas	954MW
22	Yazd CCGT	Yazd	Iran	54.07	31.95	0.98+/-0.20	5.19+/-1.04	0.97+/-1.18	5.14+/-6.24	Gas	526MW
23	Al Wajbha GT	Al Wajbha	Qatar	51.4	25.3	0.94+/-0.29	2.77+/-0.85	0.83+/-1.78	2.44+/-5.23	Gas	301MW
24	Rudeshur OCGT	Tehran	Iran	50.91	35.42	0.92+/-0.31	3.56+/-1.20	0.80+/-1.88	3.12+/-7.28	Gas	792MW
25	Riyadh PP8 A GT	Riyadh	Saudi Arabia	46.57	24.6	0.91+/-0.37	2.68+/-1.08	1.25+/-2.19	3.66+/-6.43	Gas	1000MW
26	Ahwaz (Ramin) Thermal	Kuzestan	Iran	48.88	31.5	0.91+/-0.32	2.80+/-0.99	0.72+/-1.96	2.21+/-6.03	Oil	1890MW
27	Doha East and Doha West Thermal	Al Jahra	Kuwait	47.79	29.37	0.90+/-0.25	3.02+/-0.85	1.09+/-1.51	3.65+/-5.07	Both	3999MW
28	Gilan CCGT	Gilan	Iran	49.63	37.16	0.89+/-0.43	3.19+/-1.54	0.41+/-2.71	1.46+/-9.71	Gas	1305.6MW
29	Zargan	Khuzestan	Iran	48.77	31.37	0.89+/-0.28	2.74+/-0.86	1.07+/-1.72	3.32+/-5.30	Gas	418MW
30	Kerman CCGT	Kerman	Iran	56.79	30.21	0.85+/-0.17	5.12+/-1.03	0.93+/-1.02	5.58+/-6.16	Gas	1912MW
31	Amman East (AES Jordan) CCGT	Amman	Jordan	36.08	31.9	0.84+/-0.29	2.86+/-0.97	1.34+/-1.61	4.57+/-5.48	Gas	380MW
32	Riyadh PP5 Oil GT	Riyadh	Saudi Arabia	46.59	24.76	0.83+/-0.31	2.48+/-0.94	0.80+/-1.92	2.39+/-5.75	Oil	528MW
33	Kazeroon CCGT	Kazeroun	Iran	51.7	29.56	0.80+/-0.25	3.86+/-1.19	1.25+/-1.29	6.06+/-6.25	Gas	1370MW
34	Tous Thermal and OCGT	Razavi Khorasan	Iran	59.4	36.44	0.79+/-0.29	2.89+/-1.07	0.77+/-1.65	2.84+/-6.05	Gas	1554MW
35	Shaiba Desalination and	Makkah	Saudi Arabia	39.56	20.63	0.79+/-0.25	3.43+/-1.09	0.89+/-1.47	3.89+/-6.42	Oil	5523MW
36	Shazand (Arak) Thermal	Markazi	Iran	49.5	34	0.78+/-0.33	4.21+/-1.77	0.19+/-2.05	1.03+/-11.07	Oil	1300MW
37	Riyadh 10 CCGT	Ar Riyad	Saudi Arabia	47.02	24.42	0.78+/-0.31	3.22+/-1.29	0.82+/-1.92	3.40+/-7.97	Gas	3400MW
38	Qassim PP3 Oil GT	Buraydah (Qassim)	Saudi Arabia	44.02	26.2	0.76+/-0.17	3.40+/-0.77	0.77+/-1.01	3.43+/-4.49	Gas	N/A
39	Gazlan I and II Thermal	Ras Tanura	Saudi Arabia	49.9	26.85	0.75+/-0.33	1.88+/-0.83	0.01+/-1.91	0.03+/-4.78	Gas	4528MW
40	Orumiyah OCGT	Ora	Iran	45.08	37.57	0.75+/-0.19	4.12+/-1.02	1.09+/-1.12	5.99+/-6.15	Gas	60MW
41	Baalbek Thermal	Baalbek-Hermel	Lebanon	36.19	34.02	0.73+/-0.23	3.21+/-1.00	0.39+/-1.25	1.70+/-5.48	Gas	70MW
42	UAN Cogen CCGT Complex	Abu Dhabi City	UAE	54.48	24.44	0.67+/-0.31	2.09+/-0.97	0.70+/-1.83	2.18+/-5.74	Gas	2746MW
43	Madinah OCGT	Medina	Saudi Arabia	39.68	24.53	0.66+/-0.12	4.07+/-0.74	0.50+/-0.68	3.10+/-4.19	Gas	318MW
44	Ghubrah IV OCGT Power and Desalination Plant	Qurm	Oman	58.42	23.6	0.60+/-0.17	2.89+/-0.80	0.50+/-0.91	2.40+/-4.38	Gas	190MW
45	Neishabour CCGT	Razavi Khorasan	Iran	58.78	36.28	0.59+/-0.27	2.77+/-1.25	1.16+/-1.56	5.39+/-7.28	Gas	1040.4MW
46	Eitan Gas Turbine	Moshav Eitan	Israel	34.75	31.58	0.59+/-0.27	1.90+/-0.85	1.06+/-1.66	3.38+/-5.30	Gas	40MW
47	Tabuk OCGT	Tabuk	Saudi Arabia	36.52	28.47	0.57+/-0.12	3.28+/-0.71	0.56+/-0.73	3.21+/-4.19	Gas	444MW
48	Bistoon Thermal	Shahrak-e-Bistoon	Iran	47.36	34.35	0.57+/-0.25	3.14+/-1.38	0.19+/-1.54	1.05+/-8.53	Oil	640MW
49	Qurayat OCGT	Qurayat	Saudi Arabia	37.43	31.25	0.56+/-0.10	3.94+/-0.73	0.56+/-0.64	3.89+/-4.47	Gas	106MW
50	Madinat Zayed Thermal	Madinat Zayed	UAE	53.73	23.58	0.53+/-0.11	3.72+/-0.80	0.29+/-0.62	2.00+/-4.33	Oil	118MW

## Sheet: (e) HCHO-Urban
Table 2(e) The top ranked statistically significant and real linear trends in SAO HCHO vertical column densities (VCD) found over urban locations for 2005--2014. Linear trends are deemed significant if |ω/σω | > 2, and real if no statistically significant trends are observed in either the air mass factor, cloud fraction, cloud-top pressure, or number of samples. The corresponding median growth ra…
					Vertical Column Density [x1015 molecules cm-2]
Rank	Settlement	Country	Longitutde	Latitude	Linear Trend		Growth Rate		Population
			[Degrees]		ω	in %	G	in %
1	al-Wwakrah	Qatar	51.61	25.17	0.22+/-0.05	4.61+/-0.94	0.32+/-0.27	6.56+/-5.61	22712
2	Doha	Qatar	51.53	25.29	0.21+/-0.05	4.21+/-0.95	0.33+/-0.28	6.67+/-5.73	278409
3	Attaif	Saudi Arabia	40.42	21.27	0.19+/-0.07	6.95+/-2.42	0.10+/-0.40	3.52+/-14.26	534141
4	al-Hawr	Qatar	51.51	25.69	0.19+/-0.05	4.54+/-1.19	0.15+/-0.31	3.66+/-7.30	2736
5	Ar-Rayyan	Qatar	51.42	25.29	0.18+/-0.05	3.70+/-0.95	0.29+/-0.28	5.73+/-5.66	176850
6	Orumiyeh	Iran	45	37.53	0.17+/-0.07	5.27+/-2.17	0.24+/-0.46	7.14+/-13.90	509468
7	Gorgan	Iran	54.48	36.83	0.15+/-0.07	4.33+/-2.06	0.14+/-0.42	3.80+/-11.88	212724
8	as-Sahaniyah	Qatar	51.24	25.4	0.14+/-0.04	2.93+/-0.91	0.02+/-0.27	0.44+/-5.58	7614
9	Hidd	Bahrain	50.65	26.24	0.14+/-0.04	3.15+/-0.99	0.10+/-0.27	2.14+/-5.95	11292
10	Abu Zabi	UAE	54.37	24.47	0.14+/-0.04	3.16+/-0.89	0.13+/-0.24	3.14+/-5.61	524782
11	Sur	Oman	59.53	22.57	0.13+/-0.04	3.98+/-1.32	0.18+/-0.25	5.40+/-7.52	71666
12	Al Masnaah	Oman	57.63	23.78	0.13+/-0.04	3.36+/-1.03	0.03+/-0.26	0.91+/-6.88	46605
13	Sayhat	Saudi Arabia	50.04	26.48	0.12+/-0.05	2.55+/-1.03	0.16+/-0.27	3.45+/-5.81	74527
14	Addammam	Saudi Arabia	50.11	26.43	0.12+/-0.04	2.55+/-0.97	0.17+/-0.26	3.75+/-5.67	619117
15	Safwah	Saudi Arabia	49.96	26.65	0.11+/-0.05	2.63+/-1.08	0.17+/-0.27	3.83+/-6.20	47864
16	al Qatif	Saudi Arabia	50.02	26.52	0.11+/-0.05	2.51+/-1.09	0.14+/-0.29	3.11+/-6.31	126975
17	Barkah	Oman	57.89	23.71	0.11+/-0.04	3.11+/-0.99	0.20+/-0.22	5.42+/-6.01	74263
18	as Sib	Oman	58.19	23.67	0.11+/-0.04	3.10+/-1.05	0.13+/-0.23	3.61+/-6.37	236849
19	Abs	Yemen	43.2	16	0.11+/-0.05	2.38+/-0.98	0.21+/-0.27	4.43+/-5.65	24875
20	Umm-al-Qaywayn	UAE	55.55	25.57	0.11+/-0.05	2.36+/-1.09	0.09+/-0.31	1.97+/-6.55	32974
21	Dhahran	Saudi Arabia	50.13	26.3	0.11+/-0.05	2.24+/-0.98	0.11+/-0.26	2.37+/-5.47	94591
22	Ibri	Oman	56.5	23.24	0.11+/-0.05	3.46+/-1.48	0.10+/-0.28	3.17+/-9.14	116132
23	Bawsar	Oman	58.39	23.53	0.10+/-0.04	2.88+/-1.05	0.14+/-0.23	3.95+/-6.48	164266
24	Tarut	Saudi Arabia	50.06	26.57	0.10+/-0.05	2.37+/-1.06	0.15+/-0.27	3.40+/-6.25	48848
25	Qom	Iran	50.95	34.65	0.10+/-0.05	2.84+/-1.34	0.13+/-0.29	3.53+/-8.09	864554
26	Abu Aris	Saudi Arabia	42.83	16.97	0.10+/-0.05	2.18+/-1.04	0.07+/-0.30	1.49+/-6.53	45116
27	Ras al Khaimah	UAE	55.94	25.79	0.10+/-0.05	2.25+/-1.09	-0.00+/-0.29	-0.03+/-6.55	102075
28	al Khobar	Saudi Arabia	50.2	26.23	0.10+/-0.05	2.14+/-1.00	0.04+/-0.27	0.83+/-5.94	181867
29	Rahimah	Saudi Arabia	50.06	26.71	0.10+/-0.04	2.42+/-1.11	0.08+/-0.26	2.05+/-6.47	58367
30	Arad	Israel	35.22	31.25	0.10+/-0.05	2.59+/-1.25	0.08+/-0.29	2.21+/-7.89	23810
31	Arrass	Saudi Arabia	43.5	25.87	0.09+/-0.04	2.93+/-1.17	0.12+/-0.22	3.96+/-7.20	72994
32	al-Hillah	Iraq	44.43	32.48	0.09+/-0.04	2.06+/-0.94	0.02+/-0.25	0.38+/-5.72	385725
33	Buqayq	Saudi Arabia	49.67	25.94	0.09+/-0.04	1.96+/-0.93	0.09+/-0.25	1.89+/-5.61	41057
34	Riyadh	Saudi Arabia	46.77	24.64	0.09+/-0.04	2.39+/-1.10	0.07+/-0.23	1.97+/-6.47	3563456

## Sheet: (f) HCHO-Oil-Refinery
Table 2(f) The top ranked statistically significant and real linear trends in SAO HCHO vertical column densities (VCD) found over oil refineries for 2005--2014. Linear trends are deemed significant if |ω/σω | > 2, and real if no statistically significant trends are observed in either the air mass factor, cloud fraction, cloud-top pressure, or number of samples. The corresponding median growth rat…
						Vertical Column Density [x1015 molecules cm-2]
Rank	Refinery	Location	Country	Lognitude	Latitude	Linear Trend		Growth Rate		Capacity
				[Degrees]		ω	in %	G	in %	[b/cd]
1	Takreer	Ruwais	UAE	52.72	24.12	0.15+/-0.05	3.47+/-1.04	0.15+/-0.29	3.47+/-6.57	284000
2	Takreer	Umm Al-Nar	UAE	54.48	24.42	0.14+/-0.04	2.98+/-0.93	0.09+/-0.25	1.99+/-5.38	25000
3	Saudi Arabian Oil Co.	Yanbuh	Saudi Arabia	38.23	23.96	0.13+/-0.05	3.43+/-1.23	0.08+/-0.29	2.10+/-7.58	170000
4	Saudi Aramco Mobil	Yanbuh	Saudi Arabia	38.3	23.93	0.12+/-0.04	3.05+/-1.17	0.09+/-0.28	2.25+/-7.27	232000
5	Saudi Arabian Oil Co.	Ras Tanura	Saudi Arabia	50.08	26.7	0.10+/-0.04	2.42+/-1.11	0.08+/-0.26	2.05+/-6.47	350000
6	National Iranian Oil Co.	Bandar Abbas	Iran	56.07	27.17	0.07+/-0.03	1.80+/-0.86	0.02+/-0.20	0.54+/-5.21	253650

## Sheet: (g) HCHO-Oil-Port
Table 2(g) The top ranked statistically significant and real linear trends in SAO HCHO vertical column densities (VCD) found over oil ports for 2005--2014. Linear trends are deemed significant if |ω/σω | > 2, and real if no statistically significant trends are observed in either the air mass factor, cloud fraction, cloud-top pressure, or number of samples. The corresponding median growth rate der…
						Vertical Column Density [x1015 molecules cm-2]
Rank	Port	Location	Country	Lognitude	Latitude	Linear Trend		Growth Rate
				[Degrees]		ω	in %	G	in %
1	Ras Laffan	Al Khawr	Qatar	51.61	25.93	0.16+/-0.05	4.03+/-1.14	0.16+/-0.27	3.98+/-6.73
2	Al-Ruwais	Abu Dhabi	UAE	52.72	24.16	0.15+/-0.05	3.50+/-1.05	0.15+/-0.29	3.39+/-6.70
3	Umm Al-Narr	Abu Dhabi	UAE	54.5	24.45	0.13+/-0.04	2.90+/-0.95	0.08+/-0.25	1.80+/-5.41
4	Bandar-e Khomeni (BIK)	Khuzestan	Iran	49.09	30.42	0.11+/-0.05	2.22+/-1.09	0.15+/-0.33	2.93+/-6.67

## Sheet: (h) HCHO-Power-Plant
Table 2(h) The top ranked statistically significant and real linear trends in SAO HCHO vertical column densities (VCD) found over power plants for 2005--2014. Linear trends are deemed significant if |ω/σω | > 2, and real if no statistically significant trends are observed in either the air mass factor, cloud fraction, cloud-top pressure, or number of samples. The corresponding median growth rate …
						Vertical Column Density [x1014 molecules cm-2]
Rank	Power Plant	Location	Country	Lognitude	Latitude	Linear Trend		Growth Rate		Plant
				[Degrees]		ω	in %	G	in %	Fuel	Capacity
1	Ras Abu Fontas OCGT Complex	Doha	Qatar	51.62	25.2	0.22+/-0.05	4.61+/-0.94	0.32+/-0.27	6.56+/-5.61	Gas	2178MW
2	Doha South Super GT	Doha	Qatar	51.52	25.19	0.21+/-0.04	4.30+/-0.87	0.29+/-0.26	5.76+/-5.27	Gas	67MW
3	Mobin Petroshimi OCGT CHP	Bushehr	Iran	52.55	27.55	0.21+/-0.05	5.12+/-1.25	0.28+/-0.32	6.65+/-7.63	Gas	738MW
4	Taif OCGT	Taif	Saudi Arabia	40.41	21.28	0.19+/-0.07	6.95+/-2.42	0.10+/-0.40	3.52+/-14.26	Gas	116MW
5	Al Wajbha GT	Al Wajbha	Qatar	51.4	25.3	0.18+/-0.05	3.70+/-0.95	0.29+/-0.28	5.73+/-5.66	Gas	301MW
6	Al Saliyah GT	Ar Rayyan	Qatar	51.39	25.21	0.18+/-0.05	3.66+/-0.95	0.28+/-0.28	5.71+/-5.61	Gas	134MW
7	Asalooyeh OCGT	Bushehr	Iran	52.66	27.49	0.16+/-0.05	3.82+/-1.32	0.21+/-0.32	5.11+/-7.96	Gas	954MW
8	Ruwais (Takreer) Cogen GT	Abu Dhabi City	UAE	52.73	24.13	0.15+/-0.05	3.47+/-1.04	0.15+/-0.29	3.47+/-6.57	Gas	700MW
9	Orumiyah OCGT	Ora	Iran	45.08	37.57	0.14+/-0.06	4.34+/-1.99	0.21+/-0.41	6.60+/-12.62	Gas	60MW
10	UAN Cogen CCGT Complex	Abu Dhabi City	UAE	54.48	24.44	0.14+/-0.04	2.98+/-0.93	0.09+/-0.25	1.99+/-5.38	Gas	2746MW
11	Gazlan I and II Thermal	Ras Tanura	Saudi Arabia	49.9	26.85	0.13+/-0.05	3.08+/-1.15	0.10+/-0.29	2.43+/-6.62	Gas	4528MW
12	Marafiq Yanbu Water and	Yanbu (Madinah)	Saudi Arabia	38.21	23.97	0.13+/-0.05	3.43+/-1.23	0.08+/-0.29	2.10+/-7.58	Gas	1530MW
13	Shuweihat I Cogen CCGT	Jebel Dhana	UAE	52.57	24.17	0.13+/-0.05	2.95+/-1.05	0.21+/-0.30	4.81+/-6.78	Gas	1615MW
14	Abu Dhabi Power Station (ADPS)	Abu Dhabi City	UAE	54.38	24.51	0.13+/-0.04	3.02+/-0.91	0.19+/-0.24	4.51+/-5.74	Gas	518MW
15	Aqaba Thermal Jordan	Aqaba	Jordan	34.98	29.38	0.13+/-0.05	5.45+/-2.01	0.12+/-0.28	5.32+/-11.94	Gas	650MW
16	Petroshimi (Bandar Immam)	Khuzestan	Iran	49.1	30.4	0.11+/-0.05	2.28+/-1.06	0.16+/-0.33	3.23+/-6.49	Gas	827MW
17	Qom CCGT	Qom	Iran	50.76	34.58	0.11+/-0.05	3.16+/-1.38	0.10+/-0.31	2.84+/-8.44	Gas	714MW
18	Najran OCGT	Najran	Saudi Arabia	44.34	17.6	0.11+/-0.04	4.32+/-1.70	0.09+/-0.28	3.51+/-10.67	Gas	317.5MW
19	Rusail OCGT Oman	Batinah	Oman	58.2	23.55	0.11+/-0.04	2.96+/-1.08	0.09+/-0.23	2.45+/-6.37	Gas	653MW
20	Riyadh PP4 Oil GT	Riyadh	Saudi Arabia	46.67	24.65	0.11+/-0.04	3.00+/-1.25	0.14+/-0.27	3.90+/-7.44	Gas	65MW
21	AES Barka I CCGT Power and Desalination Plant	Al Batinah	Oman	57.98	23.71	0.10+/-0.04	2.90+/-1.00	0.19+/-0.21	5.24+/-5.92	Gas	427MW
-	Barka II CCGT Power and Desalination Plant	Muscat	Oman	57.98	23.71	0.10+/-0.04	2.90+/-1.00	0.19+/-0.21	5.24+/-5.92	Gas	728MW
23	Taweelah Cogen CCGT Complex	Abu Dhabi City	UAE	54.68	24.76	0.10+/-0.04	2.40+/-0.95	0.17+/-0.24	3.90+/-5.61	Gas	4696MW
24	Tihama Ras Tanura Cogeneration GT	Ras Tanura	Saudi Arabia	50	26.8	0.10+/-0.04	2.46+/-1.08	0.03+/-0.27	0.73+/-6.46	Gas	148MW
25	Tihama Shedqum Cogeneration GT	Ash Sharqiyah	Saudi Arabia	49.39	25.65	0.09+/-0.04	2.23+/-0.87	0.02+/-0.22	0.58+/-5.13	Gas	305MW
26	Qaisumah OCGT	Al Qaysumah	Saudi Arabia	46.05	28.35	0.08+/-0.04	2.46+/-1.22	0.10+/-0.23	3.22+/-7.31	Gas	103.4MW

## Sheet: (i) SO2-Urban
Table 2(i) The top ranked statistically significant and real linear trends in NASA SO2 vertical column densities (VCD) found over urban locations for 2005--2014. Linear trends are deemed significant if |ω/σω | > 2, and real if no statistically significant trends are observed in either the cloud fraction, cloud-top pressure, or number of samples. The corresponding median growth rate derived from t…
					Vertical Column Density [Dobson Units]
Rank	Settlement	Country	Longitutde	Latitude	Linear Trend		Growth Rate		Population
			[Degrees]		ω	in %	G	in %
1	Ilam	Iran	46.43	33.64	0.044+/-0.012	32.48+/-9.22	0.048+/-0.075	35.84+/-55.35	134885
2	Tabriz	Iran	46.3	38.08	0.038+/-0.015	60.75+/-23.76	0.018+/-0.085	29.25+/-137.52	1279534
3	Baghdad	Iraq	44.39	33.34	0.035+/-0.008	9.78+/-2.25	0.048+/-0.048	13.18+/-13.37	5511490
4	Irbil	Iraq	44.01	36.19	0.034+/-0.010	20.47+/-6.02	0.012+/-0.061	7.23+/-36.80	697271
5	Maragheh	Iran	46.22	37.42	0.031+/-0.010	111.05+/-36.18	0.034+/-0.060	121.69+/-212.45	145618
6	Azrashahr	Iran	45.97	37.76	0.031+/-0.011	118.49+/-42.78	0.036+/-0.069	138.71+/-261.53	33801
7	Arak	Iran	49.68	34.09	0.031+/-0.015	8.78+/-4.30	0.029+/-0.093	8.45+/-26.71	425528
8	Mobarakeh	Iran	51.66	32.48	0.021+/-0.010	7.62+/-3.68	0.006+/-0.060	1.98+/-21.48	54286
9	Sari	Iran	53.06	36.57	0.021+/-0.010	13.31+/-6.19	0.037+/-0.057	23.64+/-36.46	221905
10	al-Hillah	Iraq	44.43	32.48	0.020+/-0.008	9.48+/-3.54	0.008+/-0.043	3.56+/-20.34	385725
11	Neka	Iran	53.29	36.66	0.020+/-0.009	10.54+/-4.76	0.023+/-0.054	12.18+/-28.21	40931
12	al-Kut	Iraq	45.83	32.5	0.018+/-0.008	9.84+/-4.44	0.011+/-0.051	5.93+/-27.23	262832
13	Chenaran	Iran	59.1	36.65	0.017+/-0.007	14.52+/-5.75	0.017+/-0.044	14.44+/-36.92	36755
14	Behshahr	Iran	53.54	36.69	0.016+/-0.007	9.56+/-4.52	0.004+/-0.044	2.30+/-26.63	81469
15	Hamismusayt	Saudi Arabia	42.73	18.31	-0.013+/-0.006	-61.64+/-28.73	-0.018+/-0.036	-85.68+/-174.83	279662
16	Abha	Saudi Arabia	42.51	18.22	-0.013+/-0.006	-22.47+/-10.03	-0.000+/-0.037	-0.83+/-63.93	144171
17	Umm al-Qaywayn	UAE	55.55	25.57	-0.017+/-0.008	-5.53+/-2.68	-0.004+/-0.049	-1.37+/-15.63	32974
18	Bandar Khomeyni	Iran	49.11	30.44	-0.024+/-0.010	-5.78+/-2.37	-0.056+/-0.059	-13.50+/-14.05	55101

## Sheet: (j) SO2-Oil-Refinery
Table 2(j) The top ranked statistically significant and real linear trends in NASA SO2 vertical column densities (VCD) found over oil refineries for 2005--2014. Linear trends are deemed significant if |ω/σω | > 2, and real if no statistically significant trends are observed in either the cloud fraction, cloud-top pressure, or number of samples. The corresponding median growth rate derived from th…
						Vertical Column Density [Dobson Units]
Rank	Refinery	Location	Country	Lognitude	Latitude	Linear Trend		Growth Rate		Capacity
				[Degrees]		ω	in %	G	in %	[b/cd]
1	Midland Refineries Co.	Daura (Baghdad)	Iraq	44.42	33.27	0.042+/-0.010	9.13+/-2.16	0.046+/-0.060	10.11+/-13.07	350000
2	National Iranian Oil Co.	Arak	Iran	49.47	34	0.028+/-0.014	9.37+/-4.55	0.036+/-0.084	11.81+/-27.79	253650
3	Oil Refineries Administration	Mufthia	Iraq	44.12	33.65	0.019+/-0.008	14.88+/-6.02	0.012+/-0.044	9.22+/-34.40	170000

[truncated: 4 more sheets: (k) SO2-Oil-Port, (l) SO2-Power-Plant, (m) CHOCHO-Urban, (n) CHOCHO-Power-Plant]
